# Supplementary material for: General environmental heterogeneity as the explanation of sexuality? Comparative study shows that ancient asexual taxa are associated with both biotically and abiotically homogeneous environments
Source: PubMed Central journal article supplement (PMC5773305; doi:10.1002/ece3.3716), 2017-12-12
Supplement: ECE3-8-973-s001.pdf [file ECE3-8-973-s001.pdf]

1 Supporting information: 2 supplemental tables, Supplemental Material and Methods and  
 2 Supplemental review of AA ecology

3 **Table S1: Ancient asexual taxa**

4 List of explicitly and implicitly proposed ancient asexual taxa along with their AA status according to the actual state of knowledge.  
 5 Evidence for and against ancient asexuality was evaluated in each group and only well supported AAs were included in our study. The  
 6 two criteria for inclusion were (1) obligately asexual reproduction, i.e. the absence of common or rare/cryptic sexual events, or derived  
 7 forms of genetic exchange, for (2) at least 1 million years.

| Taxon                             | Ancient asexuality | Explicitly proposed in | Evidence against                                                                                                                                                                                                                                                                            | Evidence for                                                                                                                                                                                                                                                                                                                                                                                                                                                                                                                                                                                                                                                                                                                                                                                                                                                                                                                                                                                                                                                                                                                                                                              |
|-----------------------------------|--------------------|------------------------|---------------------------------------------------------------------------------------------------------------------------------------------------------------------------------------------------------------------------------------------------------------------------------------------|-------------------------------------------------------------------------------------------------------------------------------------------------------------------------------------------------------------------------------------------------------------------------------------------------------------------------------------------------------------------------------------------------------------------------------------------------------------------------------------------------------------------------------------------------------------------------------------------------------------------------------------------------------------------------------------------------------------------------------------------------------------------------------------------------------------------------------------------------------------------------------------------------------------------------------------------------------------------------------------------------------------------------------------------------------------------------------------------------------------------------------------------------------------------------------------------|
| <i>Confirmed ancient asexuals</i> |                    |                        |                                                                                                                                                                                                                                                                                             |                                                                                                                                                                                                                                                                                                                                                                                                                                                                                                                                                                                                                                                                                                                                                                                                                                                                                                                                                                                                                                                                                                                                                                                           |
| Rotifera: <b>Bdelloidea</b>       | YES                | Maynard Smith, 1986    | <b>Domesticated horizontally transferable transposons</b> (Arkhipova & Meselson, 2005; Gladyshev & Arkhipova, 2007; Gladyshev, Meselson & Arkhipova, 2007); <b>enigmatic mentions of observed males</b> (Welch et al., 2009); <b>evidence of allele sharing</b> (Signorovitch et al., 2015) | <b>Large and diverse clade</b> (Segers, 2007, 2008); <b>monophyletic</b> (Melone & Ricci, 1995; Wallace et al., 1996; Welch & Meselson, 2000); <b>asexual radiation</b> (Ricci, 1987; Birky et al., 2005; Pouchkina-Stantcheva et al., 2007); <b>frequency of hypothetical males would be so low they would be effectively asexual</b> (Birky, 2010); <b>very old</b> (Poinar & Ricci, 1992; Waggoner & Poinar, 1993; Welch & Meselson, 2000); <b>apomixis</b> (Hsu, 1956a, b); <b>accumulation of moderately deleterious mutations</b> (Barraclough et al., 2007); <b>Meselson effect</b> (Welch & Meselson, 2000; Welch et al., 2004b); <b>degenerated tetraploids</b> (Welch et al., 2004a, 2009; Welch et al., 2008; Hur et al., 2009); <b>specialization of collinear genes</b> (Pouchkina-Stantcheva et al., 2007; Welch et al., 2009); <b>functional haploidization</b> (Arkhipova & Meselson, 2000; Welch & Meselson, 2000; Gladyshev & Meselson, 2008); <b>unidentifiable homological pairs of chromosomes</b> (Welch & Meselson, 1998); <b>genome structure incompatible with meiosis</b> (Flot et al., 2013); <b>absence of vertically transferable transposons</b> (Arkhipova |

|                                                                                                                                                                           |     |                        |                                                                                                                                                                                                                                                                                                                                                                                                                                                           |                                                                                                                                                                                                                                                                                                                                                                                                                                                                                                                                                                                                                                                                                                                                                                                                                                                                                                                                                                                                                                                                                                                                                                                                                                                                                                                                 |
|---------------------------------------------------------------------------------------------------------------------------------------------------------------------------|-----|------------------------|-----------------------------------------------------------------------------------------------------------------------------------------------------------------------------------------------------------------------------------------------------------------------------------------------------------------------------------------------------------------------------------------------------------------------------------------------------------|---------------------------------------------------------------------------------------------------------------------------------------------------------------------------------------------------------------------------------------------------------------------------------------------------------------------------------------------------------------------------------------------------------------------------------------------------------------------------------------------------------------------------------------------------------------------------------------------------------------------------------------------------------------------------------------------------------------------------------------------------------------------------------------------------------------------------------------------------------------------------------------------------------------------------------------------------------------------------------------------------------------------------------------------------------------------------------------------------------------------------------------------------------------------------------------------------------------------------------------------------------------------------------------------------------------------------------|
|                                                                                                                                                                           |     |                        |                                                                                                                                                                                                                                                                                                                                                                                                                                                           | & Meselson, 2000, 2005); <b>allele sharing due to horizontal gene transfer</b> (Debortoli et al., 2016)                                                                                                                                                                                                                                                                                                                                                                                                                                                                                                                                                                                                                                                                                                                                                                                                                                                                                                                                                                                                                                                                                                                                                                                                                         |
| Arthropoda:<br>Ostracoda:<br><b>Darwinulidae</b>                                                                                                                          | YES | Judson & Normark, 1996 | <b>Vertically transferable transposons</b> (Schön & Arkhipova, 2006); <b>rare males</b> (Rossetti & Martens, 1996; Smith et al., 2006; Schön et al., 2009); <b>uncertain Meselson effect</b> (Schön et al., 1998); <b>slow speed of molecular evolution</b> (Gandolfi et al., 2001; Schön & Martens, 2003); <b>high homozygosity</b> (Martens, 1998); <b>low morphological and genetic diversity</b> (Rossetti & Martens, 1996, 1998; Schön et al., 1998) | <b>Large and diverse clade</b> (Martens et al., 2008; Martens & Savatnalinton, 2011); <b>monophyletic</b> (Schön et al., 2003, 2009; Yamaguchi & Endo, 2003; Wysocka et al., 2006; Yu et al., 2006; Yamada, 2007; Tinn & Oakley, 2008); <b>rare males spanandric</b> (Rossetti & Martens, 1996; Smith et al., 2006; Schön et al., 2009); <b>frequency of hypothetical males would be so low they would be effectively asexual</b> (Birky, 2010); <b>probably apomixis</b> (Butlin et al., 1998); <b>absence of automixis</b> (Schön et al., 1998); <b>absence of polyploidy</b> (Rossi et al., 1998); <b>absence of fossil males since the end of Permian /Triassic?/</b> (Molostovskaya, 2000; Martens et al., 2003); <b>millions of years old fossils classifiable into recent species and genera</b> (Straub, 1952; Abushik, 1990; Martens et al., 1997; Martens et al., 1998a; Martens et al., 2003; Smith et al., 2006); <b>very old according to the molecular clock</b> (Martens et al., 2005); <b>domesticated transposons</b> (Schön & Arkhipova, 2006); <b>genetic homogeneity proven not to be the consequence of automixis or recombination</b> (Schön & Martens, 2003); <b>unidentifiable homological pairs of chromosomes</b> (Tétart, 1978); <b>absence of hybridization among lineages</b> (Rossi et al., 1998) |
| Arthropoda: Acari:<br>Oribatidae:<br><b>Nanhermanniidae, Malaconothridae, Trhypochthoniidae, Camisiidae and majority of Nothridae; Brachychthoniidae and Lohmanniidae</b> | YES | Judson & Normark, 1996 | <b>Meselson effect not observed</b> (Schaefer et al., 2006); <b>rare males</b> (Palmer & Norton, 1990, 1991; Norton et al., 1993); <b>possibly revolution of sexuality</b> (Domes et al., 2007b)                                                                                                                                                                                                                                                          | <b>Large and diverse clades</b> (Norton et al., 1993; Subías, 2004; Norton & Behan-Pelletier, 2009); <b>asexual radiations</b> (Palmer & Norton, 1991); <b>rare males spanandric</b> (Taberly, 1988; Palmer & Norton, 1990, 1991, 1992; Norton et al., 1993); <b>Meselson effect not observed because of automixis with terminal fusion of gametes</b> (Taberly, 1987; Wrensch, Kethley & Norton, 1994; Schaefer et al., 2006) <b>and mostly inverted meiosis</b> (Wrensch et al., 1994; Heethoff, 2004; Laumann et al., 2008); <b>very old</b> (Krivolutsky & Druk, 1986; Maraun et al., 2003, 2004; Heethoff et al., 2007; Laumann et al., 2007) + <b>not very good colonizers</b> (Skubala & Gulvik, 2005; Domes et al., 2007c; Cianciolo, 2009) <b>and biogeographic distribution corresponds to continental drift</b> (Hammer & Wallwork, 1979; Heethoff, 2004; Heethoff                                                                                                                                                                                                                                                                                                                                                                                                                                                   |

|                                                                                                                                                                           |     |                                        |                                                                                                                                                                                                                                                  |                                                                                                                                                                                                                                                                                                                                                                                                                                                                                                                                                                                                                                                                                                                                                                                                                                                                                                                                                                                                                                                             |
|---------------------------------------------------------------------------------------------------------------------------------------------------------------------------|-----|----------------------------------------|--------------------------------------------------------------------------------------------------------------------------------------------------------------------------------------------------------------------------------------------------|-------------------------------------------------------------------------------------------------------------------------------------------------------------------------------------------------------------------------------------------------------------------------------------------------------------------------------------------------------------------------------------------------------------------------------------------------------------------------------------------------------------------------------------------------------------------------------------------------------------------------------------------------------------------------------------------------------------------------------------------------------------------------------------------------------------------------------------------------------------------------------------------------------------------------------------------------------------------------------------------------------------------------------------------------------------|
|                                                                                                                                                                           |     |                                        |                                                                                                                                                                                                                                                  | et al., 2007); <b>absence of sexual clades closely related to asexual lineages</b> (Norton et al., 1993; Maraun et al., 2004); <b>absence of recombination</b> (Palmer & Norton, 1992; Heethoff, 2004; Schaefer et al., 2006); <b>reevolution of sexuality is exceptional and uncertain</b> (Domes et al., 2007b)                                                                                                                                                                                                                                                                                                                                                                                                                                                                                                                                                                                                                                                                                                                                           |
| Arthropoda: Acari:<br>Endeostigmata:<br><b>Nematolycidae,<br/>Proteonematolycidae<br/>; Oehserchestidae,<br/>Granjeanicidae;<br/><i>Alicorhagia,<br/>Stigmalychus</i></b> | YES | Judson &<br>Normark,<br>1996           | <b>Poorly understood</b> (Walter, 2009); <b>rare males</b> (Norton et al., 1993)                                                                                                                                                                 | <b>Rare males are spanandric; analogies with asexual Oribatidae (frequency of males, their spanandric character, ecology, distribution, population genetics etc.)</b> (Norton et al., 1993)                                                                                                                                                                                                                                                                                                                                                                                                                                                                                                                                                                                                                                                                                                                                                                                                                                                                 |
| Arthropoda: Acari:<br>Trombidiformes:<br><b>Lordalycidae;<br/>Pomerantziidae</b>                                                                                          | YES | Judson &<br>Normark,<br>1996           | <b>Poorly understood</b> (Walter et al., 2009); <b>rare males</b> (Norton et al., 1993)                                                                                                                                                          | <b>Rare males are spanandric; analogies with asexual Oribatidae (frequency of males, their spanandric character, ecology, distribution, population genetics etc.)</b> (Norton et al., 1993)                                                                                                                                                                                                                                                                                                                                                                                                                                                                                                                                                                                                                                                                                                                                                                                                                                                                 |
| Arthropoda:<br>Phasmatodea:<br><b><i>Timema:</i><br/><i>Timema tahoe,</i><br/><i>Timema monikensis,</i><br/><i>Timema genevieve</i></b>                                   | YES | Sandoval,<br>Carmean &<br>Crespi, 1998 | <b>Rare males</b> (Vickery & Sandoval, 2001; Law & Crespi, 2002a); <b>no signs of haploidization</b> (Schwander & Crespi, 2009a)                                                                                                                 | <b>Obligatory parthenogenesis</b> (Sandoval & Vickery, 1996; Sandoval et al., 1998; Law & Crespi, 2002a, b; Schwander & Crespi, 2009a); <b>apomixis</b> (Crespi & Sandoval, 2000; Law & Crespi, 2002a; Schwander & Crespi, 2009a; Schwander, Henry & Crespi, 2011); <b>asexual females do not mate with sexual males</b> (Sandoval et al., 1998); <b>rare males spanandric</b> (Law & Crespi, 2002a; Schwander & Crespi, 2009a); <b>degeneration of sexual traits in females</b> (Schwander et al., 2013); <b>recombination, haploid gametes and meiosis never observed</b> (Schwander et al., 2010, 2011); <b>degradation of chromosome pairing in <i>Timema genevieve</i></b> (Schwander & Crespi, 2009a); <b>very old</b> (Law & Crespi, 2002a, b; Schwander et al., 2011); <b>extinct or undiscovered mother species improbable</b> (Sandoval et al., 1998); <b>Meselson effect</b> (Schwander et al., 2011); <b>slower mutation speed and more deleterious mutations in asexual lineages</b> (Schwander et al., 2011; Henry, Schwander & Crespi, 2012) |
| Mollusca: Bivalvia:<br><b><i>Lasaea</i> except <i>Lasaea australis</i> and <i>Lasaea colmani</i></b>                                                                      | YES | Ó Foighil &<br>Smith, 1995             | <b>Polyphyletic asexual lineages probably originated in hybridizations</b> (Thiriout-Quivieux, 1992; Ó Foighil & Smith, 1995; Taylor & Ó Foighil, 2000; Li et al., 2013); <b>sperm still able to bind to an egg and penetrate it</b> (Ó Foighil, | <b>Pseudogamous self-fertilizing hermaphrodites /autogynogenesis/</b> (Ó Foighil & Eernisse, 1988; Ó Foighil & Thiriout-Quivieux, 1991, 1999; Ó Foighil & Smith, 1995; Taylor & Ó Foighil, 2000); <b>no outcrossing</b> (Ó Foighil, 1988); <b>male genetic material from sperm never transmit</b>                                                                                                                                                                                                                                                                                                                                                                                                                                                                                                                                                                                                                                                                                                                                                           |

|                                                               |     |              |                                                                                                                                                                       |                                                                                                                                                                                                                                                                                                                                                                                                                                                                                                                                                                                                                                                                                                                                                                                                                                                                                                                                                                                                                                                                                                                                                                                                                                                                                                                                                                                                                                                                                                                                                                                                                                                                                                                                                                |
|---------------------------------------------------------------|-----|--------------|-----------------------------------------------------------------------------------------------------------------------------------------------------------------------|----------------------------------------------------------------------------------------------------------------------------------------------------------------------------------------------------------------------------------------------------------------------------------------------------------------------------------------------------------------------------------------------------------------------------------------------------------------------------------------------------------------------------------------------------------------------------------------------------------------------------------------------------------------------------------------------------------------------------------------------------------------------------------------------------------------------------------------------------------------------------------------------------------------------------------------------------------------------------------------------------------------------------------------------------------------------------------------------------------------------------------------------------------------------------------------------------------------------------------------------------------------------------------------------------------------------------------------------------------------------------------------------------------------------------------------------------------------------------------------------------------------------------------------------------------------------------------------------------------------------------------------------------------------------------------------------------------------------------------------------------------------|
|                                                               |     |              | 1987); <b>the age estimated from biogeography could be an artefact if they are shown up to be good colonizers in ecological timescales</b> (Taylor & Ó Foighil, 2000) | <b>to offspring</b> (Ó Foighil & Thiriot-Quévieux, 1991); <b>minimal male reproductive allocation, sperm are few and degenerated</b> (Ó Foighil, 1985; Beauchamp, 1986; McGrath & Ó Foighil, 1986); <b>no specialized sexual structures</b> (Ó Foighil & Eernisse, 1988); <b>almost certainly apomixis</b> (Ó Foighil & Thiriot-Quévieux, 1991); <b>meiosis and segregation of chromosomes never observed</b> (Ó Foighil & Eernisse, 1988; Thiriot-Quévieux et al., 1988; Ó Foighil & Thiriot-Quévieux, 1991); <b>adaptation and differentiation in asexuality</b> (Ó Foighil & Eernisse, 1988; Ó Foighil & Smith, 1996; Taylor & Ó Foighil, 2000; Li et al., 2013) <b>including ecological specializations</b> (Crisp & Standen, 1988; Tyler-Walters & Davenport, 1990); <b>polyploidy</b> (Ó Foighil & Smith, 1995); <b>variable count of chromosomes, frequent non-pairing chromosomes, impossibility of meiosis</b> (Thiriot-Quévieux et al., 1988; Ó Foighil & Thiriot-Quévieux, 1991, 1999); <b>very old</b> (Ó Foighil & Smith, 1995, 1996; Ó Foighil & Jozefowicz, 1999; Li et al., 2013); <b>absence of cosmopolitan lineages, no rapid colonization</b> (Taylor & Ó Foighil, 2000); <b>comparable substitution speeds of sexual and asexual lineages</b> (Ó Foighil & Smith, 1995; Li et al., 2013); <b>colonization of large areas by rafting in direct-developing asexuals, long time ago when the ocean currents were different</b> (Ó Foighil & Jozefowicz, 1999); <b>repeated transitions between sexuality and asexuality, transfer of male genetic material or parallel neutral evolution highly improbable</b> (Ó Foighil & Smith, 1995); <b>undiscovered sexual lineages improbable</b> (Ó Foighil & Smith, 1995; Taylor & Ó Foighil, 2000) |
| Polypodiophyta:<br>Vittariaceae: <i>Vittaria appalachiana</i> | YES | Farrar, 1978 | <b>Retrotransposons</b> (Docking et al., 2006); <b>rarely observed sporophytes</b> (Farrar, 1978; Caponetti et al., 1982)                                             | <b>Exclusively asexual gametophyte</b> (Farrar, 1967); <b>asexual reproduction by gemmae and fission of thallus</b> (Farrar, 1974); <b>monophyletic</b> (Farrar, 1978, 1985, 1990); <b>rare sporophytes always abortive</b> (Farrar, 1978; Caponetti et al., 1982); <b>very old</b> (Docking et al., 2006) + <b>most probably sister to some central- or south-American species</b> (Farrar, 1985) + <b>sporophytes do not tolerate freezing, very limited migration and colonization, geographical distribution is relict of that of its mother species</b> (Farrar, 1978; Parks & Farrar, 1984; Farrar, 1990, 1998); <b>internally genetically uniform but disparate populations</b> (Farrar, 1978, 1985);                                                                                                                                                                                                                                                                                                                                                                                                                                                                                                                                                                                                                                                                                                                                                                                                                                                                                                                                                                                                                                                   |

|                                                                       |    |                                  |                                                                                                                                                                                                      |                                                                                                                                                                          |
|-----------------------------------------------------------------------|----|----------------------------------|------------------------------------------------------------------------------------------------------------------------------------------------------------------------------------------------------|--------------------------------------------------------------------------------------------------------------------------------------------------------------------------|
|                                                                       |    |                                  |                                                                                                                                                                                                      | <b>absence of gene flow</b> (Farrar, 1990); <b>adaptations in asexual state</b> (Farrar, 1985, 1990); <b>transposons probably domesticated</b> (Schön & Arkhipova, 2006) |
| <i>Refused and contested ancient asexuals</i>                         |    |                                  |                                                                                                                                                                                                      |                                                                                                                                                                          |
| Polypodiophyta:<br>Hymenophyllaceae:<br><i>Trichomanes intricatum</i> | NO | Judson & Normark, 1996           | <b>Overestimated age</b> (Ebihara et al., 2008)                                                                                                                                                      | <b>Obligately asexual</b> (Farrar, 1990, 1992)                                                                                                                           |
| Chordata:<br>Lissamphibia:<br><i>Ambystoma</i>                        | NO | Spolsky, Phillips & Uzzell, 1992 | <b>Transfer of paternal genetic information from sperm in gynogenesis</b> (Hedges et al., 1992; Spolsky et al., 1992; Bogart et al., 2007)                                                           | <b>Gynogenetic clade old up to 3.5 MY</b> (Bi & Bogart, 2010; Bogart et al., 2007)                                                                                       |
| Chordata: Teleostei:<br><i>Poeciliopsis</i> lineage<br>MO/II          | NO | Judson & Normark, 1996           | <b>Overestimated age</b> (Mateos & Vrijenhoek, 2002)                                                                                                                                                 | <b>Old obligately asexual lineage</b> (Quattro et al., 1992)                                                                                                             |
| Arthropoda:<br>Hemiptera: <i>Trama</i>                                | NO | Moran, 1992                      | <b>Not obligately parthenogenetic – sexual populations</b> (Verma, 1969; Blackman, De Boise & Czylok, 2001)                                                                                          | <b>Obligately parthenogenetic populations</b> (Moran, 1992; Normark, 1999; Blackman, Spence & Normark, 2000)                                                             |
| Arthropoda:<br>Hemiptera: <i>Neotrama</i>                             | NO | Moran, 1992                      | <b>Not obligately parthenogenetic – sexual populations</b> (Verma, 1969; Normark & Moran, 2000)                                                                                                      | <b>Obligately parthenogenetic populations</b> (Moran, 1992; Normark, 1999; Blackman et al., 2000)                                                                        |
| Arthropoda:<br>Hemiptera: <i>Aspidiotus nerii</i>                     | NO | Provencher et al., 2005          | <b>Uncertain age</b> (Provencher et al., 2005)                                                                                                                                                       | <b>Old obligately asexual lineage</b> (Provencher et al., 2005)                                                                                                          |
| Arthropoda:<br>Hemiptera:<br><i>Rhopalosiphum padi</i>                | NO | Simon et al., 1996               | <b>Repeated generation of asexual lineages, hybridization, production of fertile males, gene flow, asexual lineages too young</b> (Simon et al., 1999; Delmotte et al., 2001; Delmotte et al., 2003) | <b>Old obligately asexual lineages</b> (Simon et al., 1996; Simon et al., 1999; Delmotte et al., 2001); <b>possibly Meselson effect</b> (Halkett et al., 2005)           |

|                                                              |    |                               |                                                                                                                                   |                                                                                     |
|--------------------------------------------------------------|----|-------------------------------|-----------------------------------------------------------------------------------------------------------------------------------|-------------------------------------------------------------------------------------|
| Arthropoda:<br>Hemiptera: <b>Adelgidae</b>                   | NO | Schwander & Crespi, 2009b     | <b>Insufficient information</b> (Havill et al., 2007)                                                                             | <b>Possibly old obligately asexual lineages</b> (Havill et al., 2007)               |
| Arthropoda:<br>Coleoptera: <b>Aramigus</b>                   | NO | Judson & Normark, 1996        | <b>Overestimated age</b> (Normark & Lanteri, 1998)                                                                                | <b>Old obligately asexual lineage</b> (Normark, 1996)                               |
| Arthropoda:<br>Coleoptera:<br><b>Calligrapha</b>             | NO | Gomez-Zurita et al., 2006     | <b>Uncertain age</b> (Gomez-Zurita et al., 2006),<br><b>possible gene flow</b> (Montelongo & Gomez-Zurita, 2015)                  | <b>Old obligately asexual lineages</b> (Gomez-Zurita et al., 2006)                  |
| Arthropoda:<br>Coleoptera:<br><b>Otiorhynchus</b>            | NO | Schwander & Crespi, 2009b     | <b>Insufficient information</b> (Stenberg & Lundmark, 2004)                                                                       | <b>Possibly old obligately asexual lineages</b> (Stenberg & Lundmark, 2004)         |
| Arthropoda:<br>Coleoptera:<br><b>Naupactus leucoloma</b>     | NO | Mayr, 1963                    | <b>Not obligately parthenogenetic – sexual populations</b> (Lanteri & Marvaldi, 1995)                                             | <b>Obligately parthenogenetic populations</b> (Mayr, 1963)                          |
| Arthropoda:<br>Phasmatodea:<br><b>Bacillus atticus</b>       | NO | Normark, Judson & Moran, 2003 | <b>Uncertain age</b> (Mantovani et al., 2001)                                                                                     | <b>Old obligately asexual lineage</b> (Mantovani et al., 2001)                      |
| Arthropoda:<br>Lepidoptera:<br><b>Naryciinae</b>             | NO | Schwander & Crespi, 2009b     | <b>Numerous recent transfers to asexuality, overestimated age</b> (Elzinga et al., 2013)                                          | <b>Old obligately asexual lineages</b> (Grapputo et al., 2005)                      |
| Arthropoda:<br>Ostracoda:<br><b>Heterocypris incongruens</b> | NO | Chaplin & Hebert, 1997        | <b>Overestimated age</b> (Tétart, 1978; Chaplin & Hebert, 1997; Martens et al., 1998b)                                            | <b>Old obligately asexual lineage</b> (Chaplin & Hebert, 1997; Butlin et al., 1998) |
| Arthropoda:<br>Ostracoda: <b>Eucypris virens</b>             | NO | Butlin et al., 1998           | <b>Overestimated age</b> (Tétart, 1978; Martens et al., 1998b; Bode et al., 2010), <b>possible gene flow</b> (Schön et al., 2000) | <b>Old obligately asexual lineage</b> (Butlin et al., 1998; Bode et al., 2010)      |

|                                                               |    |                               |                                                                                                                                                 |                                                                                                        |
|---------------------------------------------------------------|----|-------------------------------|-------------------------------------------------------------------------------------------------------------------------------------------------|--------------------------------------------------------------------------------------------------------|
| Arthropoda:<br>Anostraca: “ <i>Artemia parthenogenetica</i> ” | NO | Judson & Normark, 1996        | <b>Overestimated age</b> (Hebert et al., 2002), <b>not monophyletic</b> (Nascetti et al., 2003; Baxevanis et al., 2006; Muñoz et al., 2010)     | <b>Old obligately asexual lineage</b> (Perez et al., 1994)                                             |
| Arthropoda: Acari:<br><i>Protogamasellus</i>                  | NO | Norton et al., 1993           | <b>Arrhenotoky</b> (Afifi et al., 1986)                                                                                                         | <b>Obligately parthenogenetic</b> (Norton et al., 1993)                                                |
| Arthropoda: Acari:<br><i>Gamasellodes</i>                     | NO | Norton et al., 1993           | <b>Arrhenotoky</b> (Afifi et al., 1986)                                                                                                         | <b>Obligately parthenogenetic</b> (Norton et al., 1993)                                                |
| Arthropoda: Acari:<br><i>Geholaspis</i>                       | NO | Norton et al., 1993           | <b>Large proportion of males in some populations</b> (Gwiazdowicz & Klemm, 2004)                                                                | <b>Obligately parthenogenetic</b> (Norton et al., 1993)                                                |
| Arthropoda: Acari:<br><i>Trachytes</i>                        | NO | Norton et al., 1993           | <b>Sexual</b> (Bloszyk & Szymkowiak, 1996; Bloszyk et al., 2004)                                                                                | <b>Obligately parthenogenetic</b> (Norton et al., 1993)                                                |
| Mollusca: Gastropoda:<br><b>Thiaridae</b>                     | NO | Morrison, 1954                | <b>No larger lineage is obligately parthenogenetic – sexual populations</b> (Heller & Farstey, 1990)                                            | <b>Obligately parthenogenetic populations</b> (Morrison, 1954)                                         |
| Mollusca: Gastropoda:<br><i>Campeloma parthenum</i>           | NO | Normark et al., 2003          | <b>Repeated transfers to asexuality, uncertain age of asexual lineages, possibility of hybridization</b> (Johnson & Bragg, 1999; Johnson, 2006) | <b>Old obligately asexual lineages</b> (Johnson & Bragg, 1999); <b>Meselson effect</b> (Johnson, 2006) |
| Mollusca: Gastropoda:<br><i>Potamopyrgus antipodarum</i>      | NO | Neiman, Jokela & Lively, 2005 | <b>Unreliable age estimation</b> (Neiman et al., 2005); <b>obligatory asexuality questioned</b> (Neiman & Lively, 2005; Neiman et al., 2012)    | <b>Old obligately asexual lineages</b> (Neiman & Lively, 2004; Neiman et al., 2005)                    |
| Gastrotricha:<br><b>Chaetonida</b>                            | NO | Stanley, 1979                 | <b>Facultative parthenogenesis</b> (Thorp & Covich, 1991; Ricci & Balsamo, 2000; Weiss, 2001)                                                   | <b>Obligately parthenogenetic</b> (Pilato, 1979; Stanley, 1979)                                        |

|                                                                |    |                                 |                                                                                                                                                                                                                                                                    |                                                                                                                                                                                                              |
|----------------------------------------------------------------|----|---------------------------------|--------------------------------------------------------------------------------------------------------------------------------------------------------------------------------------------------------------------------------------------------------------------|--------------------------------------------------------------------------------------------------------------------------------------------------------------------------------------------------------------|
| Tardigrada:<br><i>Echiniscus testudo</i>                       | NO | -                               | <b>Overestimated age</b> (Jorgensen, et al., 2007)                                                                                                                                                                                                                 | <b>Old obligately asexual lineage</b> (Miller et al., 1999)                                                                                                                                                  |
| Nematoda:<br>Heteroderidae:<br><i>Meloidogyne</i>              | NO | Judson & Normark, 1996          | <b>Overestimated age</b> (Trudgill & Blok, 2001; Lunt, 2008)                                                                                                                                                                                                       | <b>Old obligately asexual lineage</b> (Triantaphyllou, 1981; Castagnonesereno et al., 1993; Tigano et al., 2005)                                                                                             |
| Platyhelminthes:<br>Turbellaria:<br><i>Schmidtea polychroa</i> | NO | -                               | <b>Overestimated age</b> (Pongratz et al., 2003)                                                                                                                                                                                                                   | <b>Old obligately asexual lineage</b> (Pongratz et al., 2003)                                                                                                                                                |
| Cnidaria: <b>Myxozoa</b>                                       | NO | -                               | <b>Evidence of sexual process</b> (Morris, 2012)                                                                                                                                                                                                                   | <b>Sexual process never observed</b>                                                                                                                                                                         |
| <b>Placozoa</b>                                                | NO | Schurko, Neiman & Logsdon, 2009 | <b>Evidence of sexual process</b> (Signorovitch et al., 2005)                                                                                                                                                                                                      | <b>Sexual process never observed</b>                                                                                                                                                                         |
| Glomeromycota:<br><b>Glomales</b>                              | NO | Judson & Normark, 1996          | <b>The evidence of recombination and sexual process</b> (Vandenkoornhuyse et al., 2001; Gandolfi et al., 2003; Croll & Sanders, 2009; Halary et al., 2011); <b>meiotic genes</b> (Corradi & Lildhar, 2012; Tisserant et al., 2013)                                 | <b>Very old obligately asexual lineage</b> (Remy et al., 1994; Rosendahl & Taylor, 1997; Stukenbrock & Rosendahl, 2005; Croll & Sanders, 2009); <b>vegetative incompatibility</b> (Giovannetti et al., 2003) |
| Basidiomycota:<br><b>Lepiotaceae</b>                           | NO | Judson & Normark, 1996          | <b>The evidence of recombination</b> (Mueller, 2002; Doherty et al., 2003; Mueller et al., 2005; Mikheyev et al., 2006); <b>formation of sexual structures</b> (Mueller, 2002; Mueller et al., 2005); <b>absence of Meselson effect</b> (Mueller et al., 1998)     | <b>Old obligately asexual lineages</b> (Chapela et al., 1994; Hinkle et al., 1994; Mueller et al., 1998)                                                                                                     |
| Basidiomycota:<br><b>Tricholomataceae</b>                      | NO | Judson & Normark, 1996          | <b>Evidence of recombination</b> (Mueller, 2002; Mueller et al., 2005; Mikheyev et al., 2006); <b>formation of sexual structures</b> (Mueller, 2002; Mueller et al., 2005); <b>ants are able to change among related strains of fungus</b> (Villesen et al., 2004) | <b>Old obligately asexual lineages</b> (Chapela et al., 1994; Hinkle et al., 1994; Mueller et al., 1998)                                                                                                     |



|                                                                                                  |    |                           |                                                                                                                                                                                                                                                            |                                                                                                                                                      |
|--------------------------------------------------------------------------------------------------|----|---------------------------|------------------------------------------------------------------------------------------------------------------------------------------------------------------------------------------------------------------------------------------------------------|------------------------------------------------------------------------------------------------------------------------------------------------------|
| Ascomycota:<br><b>Ophiostomatales</b>                                                            | NO | Normark et al., 2003      | <b>Uncertain age – horizontal transfer among bark beetles</b> (Farrell et al., 2001)                                                                                                                                                                       | <b>Old obligately asexual lineages</b> (Farrell et al., 2001)                                                                                        |
| Ascomycota:<br><i>Aspergillus fumigatus</i>                                                      | NO | -                         | <b>Evidence of sexual process</b> (O'Gorman et al., 2009)                                                                                                                                                                                                  | <b>Sexual process never observed</b>                                                                                                                 |
| Ascomycota: <i>Candida albicans</i>                                                              | NO | Schurko et al., 2009      | <b>Evidence of recombination, probably facultative sexual</b> (Graser et al., 1996; Tibayrenc, 1997; Hull & Johnson, 1999; Tzung et al., 2001; Odds et al., 2007); <b>transposons</b> (Goodwin & Poulter, 2000)                                            | <b>Parasexual cycle</b> (Bennett & Johnson, 2003; Forche et al., 2008); <b>clonal</b> (Graser et al., 1996; Tibayrenc, 1997)                         |
| Zygomycota:<br><b>Microsporidia</b><br>( <i>Encephalitozoon cuniculi</i> )                       | NO | Schwander & Crespi, 2009b | <b>Repeated recent loss of sexuality, overestimated age</b> (Ironsides, 2007; Haag et al., 2013); <b>meiotic genes</b> (Biderre et al., 1999; Ramesh et al., 2005; Cuomo et al., 2012)                                                                     | <b>Old obligately asexual lineages</b> (Tay et al., 2005)                                                                                            |
| Excavata:<br>Trichomonadida:<br><i>Trichomonas vaginalis</i>                                     | NO | Schurko et al., 2009      | <b>Meiotic genes, transposons</b> (Carlton et al., 2007; Malik et al., 2008); <b>evidence for recombination and sexual process</b> (Drmotá & Kral, 1997; Hampel et al., 2001)                                                                              | <b>Clonal</b> (Tibayrenc et al., 1990; Tibayrenc et al., 1991)                                                                                       |
| Excavata:<br><b>Diplomonadida</b><br>( <i>Giardia intestinalis</i> )                             | NO | Normark et al., 2003      | <b>Evidence of sexual process</b> (Bernander et al., 2001; Morrison et al., 2007); <b>meiotic genes</b> (Ramesh et al., 2005; Malik et al., 2008); <b>population genetics signs of sex</b> (Cooper et al., 2007; Andersson, 2012)                          | <b>Obligately parthenogenetic</b> (Dacks & Roger, 1999); <b>domesticated transposons</b> (Arkhipova & Morrison, 2001)                                |
| Excavata:<br><b>Kinetoplastea</b><br>( <i>Trypanosoma cruzi</i> ,<br><i>Trypanosoma brucei</i> ) | NO | Schurko et al., 2009      | <b>Meiotic genes, transposons</b> (Berriman et al., 2005; El-Sayed et al., 2005; Weedall & Hall, 2015); <b>evidence for recombination and sexual process</b> (MacLeod et al., 2005); <b>meiotic cycle and haploid gametes</b> (Peacock et al., 2011, 2014) | <b>Clonal</b> (Tibayrenc et al., 1990, 1991); <b>parasexual process</b> (Gaunt et al., 2003), <b>few or no recombination</b> (Oliveira et al., 1998) |
| Excavata:<br><b>Heterolobosea</b><br>( <i>Naegleria gruberi</i> )                                | NO | -                         | <b>Meiotic genes</b> (Fritz-Laylin et al., 2010)                                                                                                                                                                                                           | <b>Sexual process never observed</b>                                                                                                                 |

|                                                                                                 |    |                      |                                                                                                                                                                                                       |                                                                                                                             |
|-------------------------------------------------------------------------------------------------|----|----------------------|-------------------------------------------------------------------------------------------------------------------------------------------------------------------------------------------------------|-----------------------------------------------------------------------------------------------------------------------------|
| Excavata: <b>Jakobida</b>                                                                       | NO | -                    | <b>Genes for plasmogamy and karyogamy</b> (Speijer et al., 2015)                                                                                                                                      | <b>Sexual process never observed</b>                                                                                        |
| Excavata: <b>Malawimonadida</b>                                                                 | NO | -                    | <b>Genes for plasmogamy and karyogamy</b> (Speijer et al., 2015)                                                                                                                                      | <b>Sexual process never observed</b>                                                                                        |
| Alveolata:<br>Dinoflagellata:<br><b>Symbiodinium</b>                                            | NO | -                    | <b>Meiotic genes</b> (Chi et al., 2014)                                                                                                                                                               | <b>Sexual process never observed</b>                                                                                        |
| Alveolata:<br><b>Apicomplexa</b><br>( <i>Toxoplasma gondii</i> )                                | NO | Schurko et al., 2009 | <b>Evidence for recombination and sexual process</b> (Tibayrenc et al., 1990; Howe & Sibley, 1995; Grigg et al., 2001; Heitman, 2006; Khan et al., 2007); <b>meiotic genes</b> (Weedall & Hall, 2015) | <b>Clonal</b> (Tibayrenc et al., 1990, 1991; Howe & Sibley, 1995); <b>old</b> (Sibley & Boothroyd, 1992; Khan et al., 2007) |
| Stramenopila:<br><b>Eustigmatophyceae</b><br>( <i>Nannochloropsis oceanica</i> )                | NO | -                    | <b>Related species sexual</b> (Radakovits et al., 2012)                                                                                                                                               | <b>Haploid, sex process never observed, few mitotic genes</b> (Pan et al., 2011)                                            |
| Stramenopila:<br><b>Parmales - Bolidophyceae</b>                                                | NO | -                    | <b>Haploid and diploid stages of one group</b> (Kessenich et al., 2014)                                                                                                                               | <b>Sexual process never observed</b>                                                                                        |
| Rhizaria:<br><b>Foraminifera</b><br>( <i>Reticulomyxa filosa</i> )                              | NO | -                    | <b>Meiotic genes</b> (Glöckner et al., 2014)                                                                                                                                                          | <b>Sexual process never observed</b>                                                                                        |
| Chromista:<br><b>Cryptophyta</b><br>( <i>Chroomonas acuta</i> ;<br><i>Proteomonas sulcata</i> ) | NO | -                    | <b>Haploid gametes, syngamy</b> (Kugrens & Lee, 1988); <b>haploid and diploid stages</b> (Hill & Wetherbee, 1986)                                                                                     | <b>Sexual process never observed</b>                                                                                        |
| Chlorophyta:<br><b>Glaucophyta</b><br>( <i>Cyanophora paradoxa</i> )                            | NO | -                    | <b>Genes for plasmogamy and karyogamy</b> (Speijer et al., 2015)                                                                                                                                      | <b>Sexual process never observed</b>                                                                                        |

|                                                                                                           |    |                      |                                                                                                                                                  |                                                                                                        |
|-----------------------------------------------------------------------------------------------------------|----|----------------------|--------------------------------------------------------------------------------------------------------------------------------------------------|--------------------------------------------------------------------------------------------------------|
| Chlorophyta:<br>Prasinophyceae:<br><i>Ostreococcus tauri</i>                                              | NO | -                    | <b>Evidence of sexual process</b> (Grimsley et al., 2010)                                                                                        | <b>Sexual process never observed</b>                                                                   |
| Chlorophyta:<br><b>Trebouxiophyceae</b><br>( <i>Chlorella variabilis</i> )                                | NO | -                    | <b>Evidence of sexual process</b> (Blanc et al., 2010);<br><b>meiotic genes</b> (Fucikova et al., 2015)                                          | <b>Sexual process never observed</b>                                                                   |
| Amoebozoa:<br><b>Entamoebida</b><br>( <i>Entamoeba histolytica</i> )                                      | NO | Normark et al., 2003 | <b>Evidence of sexual process</b> (Blanc et al., 1989);<br><b>meiotic genes</b> (Ramesh et al., 2005)                                            | <b>Obligately parthenogenetic</b> (Dacks & Roger, 1999)                                                |
| Opisthokonta:<br>Ichthyosporea:<br><i>Pseudoperkinsus tapestis</i>                                        | NO | -                    | <b>Evidence of sexual process</b> (Marshall & Berbee, 2010)                                                                                      | <b>Sexual process never observed</b>                                                                   |
| Opisthokonta:<br><b>Choanoflagelata</b><br>( <i>Monosiga brevicolis</i> ;<br><i>Salpingoeca rosetta</i> ) | NO | -                    | <b>Meiotic genes</b> (Carr et al., 2010);<br><b>retrotransposons</b> (Carr et al., 2008); <b>evidence of sexual process</b> (Levin & King, 2013) | <b>Sexual process never observed</b>                                                                   |
| Opisthokonta:<br><b>Filasterea</b><br>( <i>Capsaspora owczarzaki</i> )                                    | NO | -                    | <b>Meiotic genes</b> (Suga et al., 2013)                                                                                                         | <b>Sexual process never observed</b>                                                                   |
| <i>Newly proposed ancient asexuals</i>                                                                    |    |                      |                                                                                                                                                  |                                                                                                        |
| Opisthokonta:<br><b>Cristidiscoidea</b><br>( <i>Fonticula alba</i> )                                      | ?  | Speijer et al., 2015 | <b>Poorly understood</b>                                                                                                                         | <b>Sexual process never observed; genes for plasmogamy and karyogamy absent</b> (Speijer et al., 2015) |
| Opisthokonta:<br><b>Ichthyosporea</b><br>( <i>Sphaeroforma arctica</i> )                                  | ?  | Speijer et al., 2015 | <b>Poorly understood</b>                                                                                                                         | <b>Sexual process never observed; genes for plasmogamy and karyogamy absent</b> (Speijer et al., 2015) |

|                                                                                                                                                |    |                      |                                    |                                                                                                                                                          |
|------------------------------------------------------------------------------------------------------------------------------------------------|----|----------------------|------------------------------------|----------------------------------------------------------------------------------------------------------------------------------------------------------|
| <b>Apusomonadida</b><br>( <i>Thecamonas trahens</i> )                                                                                          | ?  | Speijer et al., 2015 | <b>Poorly understood</b>           | <b>Sexual process never observed; genes for plasmogamy and karyogamy absent</b> (Speijer et al., 2015)                                                   |
| Alveolata: Ciliata:<br><b>amicronucleate ciliates</b>                                                                                          | ?  | Speijer et al., 2015 | <b>Poorly understood</b>           | <b>Clonal, unable to undergo meiosis, lineages very old !?/</b> (Doerder, 2014); <b>“auto-recombination” of macronuclei</b> (Nowacki et al., 2008, 2011) |
| <b>Breviatea, Ancyromonadida, Mantamonadida, Rigifilida, Collodictyonida, Telonemia, Centrohelida, Palpitomonadea, Katablepharida, Picozoa</b> | ?? | Speijer et al., 2015 | <b>Extremely poorly understood</b> | <b>Sexual process never observed</b>                                                                                                                     |

8

9 **Table S2: Sexual controls**

10 List of sister or closely related, ecologically comparable, sexual taxa of the ancient asexuals included in our study. In those individual  
 11 cases in which the phylogenetic relations between the sexual and asexual lineages were not entirely clear, we used the closest possible  
 12 comparable clades, i.e. clades proven to be closely related and broadly comparable in terms of their ecology—aquatic for aquatic AAs,  
 13 benthic for benthic AAs, terrestrial for terrestrial AAs, parasitic for parasitic AAs etc. In polyphyletic AA groups, monophyletic AA  
 14 lineages and their sexual controls are identified.

| <i>Ancient asexual taxon</i>                                                                                  | <i>Sexual control</i>                     | <i>Reasoning</i>                                                                                                                                                                                                                                                                                                                                                                                                                                                                                                                                                                                                        |
|---------------------------------------------------------------------------------------------------------------|-------------------------------------------|-------------------------------------------------------------------------------------------------------------------------------------------------------------------------------------------------------------------------------------------------------------------------------------------------------------------------------------------------------------------------------------------------------------------------------------------------------------------------------------------------------------------------------------------------------------------------------------------------------------------------|
| <b>Bdelloidea</b>                                                                                             | <b>Monogononta</b>                        | <b>Bdelloidea are monophyletic within Rotifera</b> (Melone & Ricci, 1995; Wallace et al., 1996; Welch & Meselson, 2000). <b>Phylogenetic relationships of the clades within Rotifera are unclear. Monogononta are ecologically comparable and closely related to Bdelloidea</b> (Garey et al., 1996; Welch, 2000; Herlyn et al., 2003; Garcia-Varela & Nadler, 2006; Sorensen & Giribet, 2006; Witek et al., 2008; Min & Park, 2009; Fontaneto & Jondelius, 2011; Lasek-Nesselquist, 2012).                                                                                                                             |
| <b>Darwinuloidea</b>                                                                                          | <b>Cypridoidea</b>                        | <b>Darwinuloidea consist of a single recent family Darwinulidae and are monophyletic within Ostracoda</b> (Schön et al., 2003, 2009; Yamaguchi & Endo, 2003; Wysocka et al., 2006; Yu et al., 2006; Yamada, 2007; Tinn & Oakley, 2008). <b>Phylogenetic relationships of the clades within Ostracoda are unclear. Cypridoidea are ecologically comparable and closely related to Darwinuloidea</b> (Scott, 1961; Maddocks, 1976; Martens et al., 1998a, b; Schön et al., 2003, 2009; Yamaguchi & Endo, 2003; Liebau, 2005; Wysocka et al., 2006; Yu et al., 2006; Tinn & Oakley, 2008).                                 |
| <b>Oribatidae - Nanhermanniidae, Malaconothridae, Trhypochthoniidae, Camisiidae, larger part of Nothridae</b> | <b>Brachypyliina</b>                      | <b>Nanhermanniidae, Malaconothridae, Trhypochthoniidae, Camisiidae and Nothridae are included into taxon Desmonomata, which is of unclear monophyly within Oribatidae. Phylogenetic relationships of the clades within Oribatidae are quite unclear. All clades within Oribatidae are ecologically comparable. Besides several isolated sexual species, Desmonomata are probably related to sexual crown group Brachypyliina</b> (Norton et al., 1993; Norton, 1994; Judson & Normark, 1996; Normark et al., 2003; Domes et al., 2007a, b; Heethoff et al., 2009; Norton & Behan-Pelletier, 2009; Dabert et al., 2010). |
| <b>Oribatidae - Brachychthoniidae</b>                                                                         | <b>Mesoplophoridae</b>                    | <b>Brachychthoniidae are probably monophyletic within Enarthronota. Phylogenetic relationships within Oribatidae are quite unclear. All clades within Oribatidae are ecologically comparable. Mesoplophoridae are closely related to Brachychthoniidae</b> (Norton et al., 1993; Norton, 1994; Judson & Normark, 1996; Normark et al., 2003; Domes et al., 2007a, b; Heethoff et al., 2009; Norton & Behan-Pelletier, 2009; Dabert et al., 2010).                                                                                                                                                                       |
| <b>Oribatidae - Lohmanniidae</b>                                                                              | <b>Remaining lineages of Enarthronota</b> | <b>Lohmanniidae are probably monophyletic within Enarthronota. Phylogenetic relationships within Oribatidae are quite unclear. All clades within Oribatidae are ecologically comparable. Lohmanniidae are basal lineage of Enarthronota and thus they can be compared only with its remaining lineages</b>                                                                                                                                                                                                                                                                                                              |

|                                                                                                                      |                                                                                                                                                                            |                                                                                                                                                                                                                                                                                                                                                                                                                                                                                                                                                 |
|----------------------------------------------------------------------------------------------------------------------|----------------------------------------------------------------------------------------------------------------------------------------------------------------------------|-------------------------------------------------------------------------------------------------------------------------------------------------------------------------------------------------------------------------------------------------------------------------------------------------------------------------------------------------------------------------------------------------------------------------------------------------------------------------------------------------------------------------------------------------|
|                                                                                                                      |                                                                                                                                                                            | (Norton et al., 1993; Norton, 1994; Judson & Normark, 1996; Normark et al., 2003; Domes et al., 2007a, b; Heethoff et al., 2009; Norton & Behan-Pelletier, 2009; Dabert et al., 2010).                                                                                                                                                                                                                                                                                                                                                          |
| <b>Endeostigmata -<br/>Nematolycidae and<br/>Proteonematalycidae</b>                                                 | <b>Micropsammidae</b>                                                                                                                                                      | <b>The sister group of Nematolycidae and Proteonematalycidae is Micropsammidae, which is also ecologically comparable</b> (Norton et al., 1993; Walter et al., 2009).                                                                                                                                                                                                                                                                                                                                                                           |
| <b>Endeostigmata -<br/>Grandjeanicidae and<br/>Oehserchestidae</b>                                                   | <b>Terpnacaridae</b>                                                                                                                                                       | <b>The sister group of Grandjeanicidae and Oehserchestidae is Terpnacaridae, which is also ecologically comparable</b> (Norton et al., 1993; Walter et al., 2009).                                                                                                                                                                                                                                                                                                                                                                              |
| <b>Endeostigmata – genera<br/><i>Alicorhagia</i> and <i>Stigmalychus</i><br/>(crown group of<br/>Alicorhagiidae)</b> | <b><i>Epistomalycus</i>/<br/>Oribatidae +<br/>Astigmata</b>                                                                                                                | <b>Genera <i>Alicorhagia</i> and <i>Stigmalychus</i> constitute the crown group of Alicorhagiidae. It is possible to compare them with the basal sexual genus of Alicorhagiidae (<i>Epistomalycus</i>). Alternatively, they can be compared with closely related groups Oribatidae + Astigmata</b> (Norton et al., 1993; Walter et al., 2009). <b>All mentioned clades are ecologically comparable. Both options were evaluated in the study.</b>                                                                                               |
| <b>Trombidiformes -<br/>Lordalycidae</b>                                                                             | <b>Sphaerolichidae +<br/>Prostigmata</b>                                                                                                                                   | <b>Lordalycidae are closely related to Sphaerolichidae and Prostigmata, which are also ecologically comparable</b> (Norton et al., 1993; Walter et al., 2009).                                                                                                                                                                                                                                                                                                                                                                                  |
| <b>Trombidiformes -<br/>Pomerantziidae</b>                                                                           | <b>Pterygosomatoidea,<br/>Raphignathoidea,<br/>Cheyletoidea and<br/>Tetranychoidae/<br/>Stigmocheylidae,<br/>Pseudocheylidae,<br/>Heterostigmata and<br/>Paratydelidae</b> | <b>Pomerantziidae are either basal in the clade including Pterygosomatoidea, Raphignathoidea, Cheyletoidea and Tetranychoidae or the clade including Stigmocheylidae, Pseudocheylidae, Heterostigmata and Paratydelidae</b> (Norton et al., 1993; Walter et al., 2009). <b>All mentioned clades are ecologically comparable. Both options were evaluated in the study.</b>                                                                                                                                                                      |
| <b><i>Vittaria appalachiana</i></b>                                                                                  | <b><i>Vittaria linneata</i>/<br/><i>Vittaria graminifolia</i></b>                                                                                                          | <b><i>Vittaria appalachiana</i> is a monophyletic clade</b> (Farrar, 1978, 1985, 1990). <b>Possible mother or sister lineages are <i>Vittaria linneata</i> (Gastony, 1977), <i>Vittaria graminifolia</i> (Crane, 1997) or (most probably) some yet unidentified neotropical species (Farrar, 1985, 1990); moreover, the origin of <i>Vittaria appalachiana</i> in interspecific hybridization cannot be ruled out (Ebihara et al., 2009). <b>All mentioned clades are ecologically comparable. All options were evaluated in the study.</b></b> |
| <b><i>Timema monikensis</i>, <i>Timema tahoe</i>, <i>Timema genevieve</i></b>                                        | <b><i>Timema cristinae</i>,<br/><i>Timema bartmani</i>,<br/><i>Timema podura</i></b>                                                                                       | <b>Phylogenetic relationships within the genus <i>Timema</i> are clear. Sister sexual lineage of <i>Timema monikensis</i> is <i>Timema cristinae</i>, sister sexual lineage of <i>Timema tahoe</i> is <i>Timema bartmani</i> and sister sexual lineage of <i>Timema genevieve</i> is <i>Timema podura</i>. <i>Timema monikensis</i> could even be internal lineage of recent <i>Timema cristinae</i> (Law &amp; Crespi, 2002a, b). <b>All mentioned species are ecologically comparable.</b></b>                                                |

|                                                        |                                                           |                                                                                                                                                                                                                                                                                                                                                                                                                                                                                                                                                                                                                                                                                                                                                                                                                                                                                   |
|--------------------------------------------------------|-----------------------------------------------------------|-----------------------------------------------------------------------------------------------------------------------------------------------------------------------------------------------------------------------------------------------------------------------------------------------------------------------------------------------------------------------------------------------------------------------------------------------------------------------------------------------------------------------------------------------------------------------------------------------------------------------------------------------------------------------------------------------------------------------------------------------------------------------------------------------------------------------------------------------------------------------------------|
| <p>The majority of lineages of genus <i>Lasaea</i></p> | <p><i>Lasaea australis</i>,<br/><i>Lasaea colmani</i></p> | <p><b>Only two diploid Australian lineages of genus <i>Lasaea</i>, <i>Lasaea australis</i> and <i>Lasaea colmani</i>, are sexual</b> (Ó Foighil &amp; Smith, 1995; Ó Foighil &amp; Thiriot-Quievreux, 1999). <b>But the asexual lineages of genus <i>Lasaea</i> almost certainly are not monophyletic and originated at least two times independently</b> (Thiriot-Quievreux, 1992; Ó Foighil &amp; Smith, 1995; Taylor &amp; Ó Foighil, 2000; Li et al., 2013). <b>Some of them are closer to <i>Lasaea australis</i>, whereas others to <i>Lasaea colmani</i>. Moreover, both sexual species probably do not have basal position within respective clades</b> (Taylor &amp; Ó Foighil, 2000; Li et al., 2013). <b>This leaves us only with the option to compare all sexual with all asexual lineages of the genus. All mentioned lineages are ecologically comparable.</b></p> |
|--------------------------------------------------------|-----------------------------------------------------------|-----------------------------------------------------------------------------------------------------------------------------------------------------------------------------------------------------------------------------------------------------------------------------------------------------------------------------------------------------------------------------------------------------------------------------------------------------------------------------------------------------------------------------------------------------------------------------------------------------------------------------------------------------------------------------------------------------------------------------------------------------------------------------------------------------------------------------------------------------------------------------------|

## 16 **Supplemental Materials and Methods: Details on determination of environmental heterogeneity**

### 17 **Biotic heterogeneity**

18 We define biotically highly heterogeneous environments as those in which selective pressures affecting the offspring differ  
19 profoundly from those that previously affected their parents because of the coadaptation (or rather counter-adaptation) of interacting  
20 organisms. Thus, the most biotically heterogeneous environments are the habitats with a high degree of competition, predation, and  
21 parasitism. Biotic heterogeneity has both temporal (the coadaptation of interacting organisms) and spatial (e.g. the migration of the  
22 offspring to the areas with new competitors, predators, and parasites) dimensions. Changes in the biotic heterogeneity are essentially  
23 unpredictable, with the exception of some ecological cycles (e. g. host-predator or host-parasite cycles). In the latter case,  
24 environments with unpredictable changes were considered more biotically heterogeneous.

25 For example, the environment of organisms that live in tight association with other organisms is biotically very heterogeneous.  
26 This applies especially to predators and parasites that are forced to respond to the evolutionary counter-moves of their prey and hosts  
27 (Dawkins & Krebs, 1979). The more specific relationship with prey and hosts they have, the stronger the selective pressures of  
28 counter-adapting prey and hosts affect them (Dawkins & Krebs, 1979). Therefore, it is expected that organisms that use non-specific  
29 predatory strategies, e.g., filtering (especially if they filter both living organisms and dead organic matter), are under relatively weak  
30 selective pressure from their prey. Their environment is consequently biotically relatively homogenous in this regard. On the other  
31 hand, the environment of organisms that are themselves under strong selective pressure of predators and parasites is highly biotically  
32 heterogeneous (Dawkins & Krebs, 1979). The environment of organisms that are not under strong selective pressures of predators and  
33 parasites for various reasons is biotically more homogenous in this regard (e.g. the environment of Darwinulidae, see Schön et al.,  
34 2009 or Bruvo et al., 2011). Another important component of environmental biotic heterogeneity is competition. The environments  
35 with complex ecosystems that are characterized by high a degree of competition, predation and parasitism among their inhabitants  
36 (e.g. ancient lakes, see Martens, 1998; Martens & Schön, 2000; Schön & Martens, 2004) are highly biotically heterogeneous for them.  
37 On the other hand, the environments with a low degree of competition, predation and parasitism (especially extreme habitats, e.g. the



38 environments of extremely high temperatures, see Tobler, 2007, or, for photosynthetic organisms, poorly lit environments, see Farrar,  
39 1978, 1998), are biotically very homogeneous for their inhabitants. The vast majority of environments on Earth are thus somewhat  
40 biotically heterogeneous. In spite of that, we can find important exceptions. This factor of environmental heterogeneity is considerably  
41 weakened especially in extreme, ephemeral and marginal habitats that cannot sustain complex ecosystems because of their extreme  
42 conditions, rapid unpredictable changes, low carrying capacity and/or insufficient energy sources (see e.g. Bell, 1982).

43 An important factor that affects the biotic heterogeneity of environment the organisms experience is the way of life practiced  
44 by aquatic organisms. On the average, lesser biotic heterogeneity is experienced by benthic (or sedentary) organisms in comparison  
45 with planktonic aquatic organisms. The reason is that the latter are subject to fast and effective transmission of parasites and  
46 pathogens, especially viruses (see e.g. Suttle et al., 1990; Bratbak et al., 1993; Fuhrman, 1999; Wommack & Colwell, 2000; Suttle,  
47 2005, 2007), because of the character of their environment—mixing of water masses lead to frequent encounters of various individuals  
48 (Emiliani, 1993a, b). Crucial difference of the resulting risks for benthic and planktonic organisms was pointed out by Emiliani (1982;  
49 1993a). Emiliani (1993a) documented that benthic representatives of Foraminifera have lower risk of extinction in comparison with  
50 planktonic ones. The average length of existence of their benthic species was 20 million years, whereas planktonic species lasted only  
51 about 7 million years. The most probable explanation of this pattern is higher susceptibility of planktonic organisms to extinction  
52 caused by lethal parasitic, especially viral, infections. This finding gave rise to the viral theory of background extinctions (Emiliani  
53 1993a, b). Evidence for the lower risks arising for benthic organisms from parasites and pathogens was also supported by other  
54 ecological studies. For example, Filippini et al. (2006) observed lower prevalence of individuals infected by viruses and consequent  
55 mortality among benthic bacteria (~0.03 %) in comparison with bacteria from water column (~6 %). Moreover, this pattern held  
56 despite much larger abundance of viruses in the sediment of studied temperate lake. Fisher et al. (2003) and Bettarel et al. (2006) came  
57 to very similar conclusions on the basis of studies of temperate oxbow lake and freshwater habitats in tropical Africa, respectively (but  
58 see Danovaro et al., 2008 for somewhat contrasting results from marine benthic sediment). Putting aside the limitations of parasite and  
59 pathogen transmission among benthic organisms, the protection of benthic organisms against viruses might be further enhanced by the

60 adsorption of viruses into organic and inorganic particles of sediment and the aggregation of benthic organisms (Filippini et al. 2006;  
61 Fisher et al., 2003). Whereas the extinction of whole species due to viral infection (eventually infection by another parasite or  
62 pathogen, e.g. fungus) is possible only under very limited conditions (see e.g. Buckwold, 1994, or de Castro & Bolker, 2005), local  
63 extinctions caused by pathogen or parasitic infections are probably quite common (Emiliani, 1982, 1993a; de Castro & Bolker 2005).  
64 The planktonic way of life thus probably considerably increases the selective pressures of parasites and pathogens and consequently  
65 the biotic heterogeneity of the environment.

66 The argument for lower biotic heterogeneity of benthic (or sedentary) organisms is possible to extend also to organisms that  
67 inhabit soil. From the viewpoint of the viral theory of background extinctions (Emiliani, 1993a, b), soil represents an environment that  
68 considerably impedes the spread of pathogens and parasites. Interactions with parasites and pathogens are very limited both in  
69 intensity and frequency due to the tortuous, i.e., multidimensional, character of soil matrix—it is best described as semi-discontinuous  
70 network of pores filled with air and/or water, or water films surrounding solid particles (Lavelle & Spain, 2003; for more information  
71 about the character of soil environment see also Wallwork, 1970; Coleman et al., 2004, or Paul, 2007). These features of soil matrix  
72 limit both the passive spread of parasites and pathogens and the frequency of encounters among their transmitters and organisms in  
73 general. The tortuous character of soil environments was stressed as a factor that limits the passive spread of viruses in benthic  
74 sediment by Fisher et al. (2003), whereas Murphy & Tate (1996) emphasized its limitations on the spread of bacteria. These  
75 observations are in agreement with Drake et al. (1998), who observed a negative correlation between the concentration of viral  
76 particles and sediment grain size. The sieving effect of the soil for organisms of various sizes is also commented by Paul (2007).  
77 Moreover, the tortuous character of soil impedes also active dispersion of organisms, e.g. when searching for prey (Elliott et al.,  
78 1980). Only a few larger organisms are able to effectively move larger distances within soil or even create their own habitats;  
79 movements of most organisms are locally constrained (Lavelle & Spain, 2003). Direct encounters between organisms, even organisms  
80 of the same species, are thus relatively infrequent. This leads, together with the limited spread of pheromones (Karasawa & Hijii,  
81 2008), for example, to frequent transitions to indirect fertilisation with the help of deposited spermatophores (see e.g. Wallwork, 1970,

82 or Lavelle & Spain, 2003). The pattern of spatial autocorrelation of genetic lineages in soil communities, for example in rotifers  
83 (Robeson et al., 2011), further supports the limited dispersal abilities of soil organisms. The genetic diversity of various Bdelloidea  
84 lineages in soil is correlated only on small spatial scales (up to 54-133 m). Operational taxonomic units identified by Robeson et al.  
85 (2011) almost did not overlap above this distance. Habitats that distanced only tens to hundreds of meters were thus inhabited  
86 overwhelmingly by separate genetic lineages. Moreover, rotifer communities differed to a certain degree even in the smallest  
87 investigated distance of 16 cm (Robeson et al., 2011)<sup>1</sup>.

88 Taken together, the tortuous character of the soil affects all soil organisms at various scales not only in terms of the reduced  
89 spread of parasites and pathogens, but also lower frequencies of encounters with predators and competitors. This leads to an overall  
90 reduction of biotic pressures in soil, which is further supported by the striking evolutionary stasis of many lineages of soil inhabiting  
91 organisms (Pilato, 1979). Moreover, species richness and population sizes, including parasites, predators and competitors, markedly  
92 decreases with the depth of soil horizon (Lavelle & Spain, 2003; Paul, 2007). Deep soil horizons are therefore even more abiotically  
93 homogeneous. The specific character of soil environment does not imply its general spatial homogeneity. On the contrary, soil is often  
94 spatially heterogeneous, especially on a larger scale (see e.g. Lavelle & Spain, 2003; Coleman et al., 2004, or Paul, 2007). It is the  
95 tortuous and multidimensional character of soil matrix that reduces biotic pressures affecting its inhabitants and makes this  
96 environment biotically very homogeneous.

97 The biotic heterogeneity of the environment the organisms experience might be reduced by the presence of durable resting  
98 stages. Organisms may get rid of parasites and pathogens, survive unfavourable environmental conditions, or colonize new habitats  
99 with naïve parasites, predators, pathogens and competitors in these stages (as do, for example, Bdelloidea—see Wilson, 2011). The  
100 geographical trend of decreasing biotic heterogeneity with increasing latitude might be expected on a global scale. Species diversity  
101 and ecosystem complexity decrease with distance from equator (Tokeshi, 1999). These events are coupled with a decreasing intensity

---

<sup>1</sup> High genetic diversity of Bdelloidea in gene *cox1* is not very surprising in the light of severe DNA breaks that originate during anhydrobiosis, following repairs of these breaks and consequent intensive horizontal gene transfer (see e.g. Gladyshev et al., 2008).

102 of parasitization, abundance, prevalence and a relative diversity of parasites (Rohde, 1986; Rohde & Heap, 1998). An analogous trend  
103 of decreasing biotic heterogeneity with increasing depth might be expected in deeper parts of the water column for the same reasons  
104 (see e.g. Etter et al., 2005).

### 105 **Abiotic heterogeneity**

106 Abiotically highly heterogeneous environments are defined as those that are highly variable regarding changes of abiotic  
107 factors. They are diverse, unstable, and have unequally distributed resources. Again, the abiotic heterogeneity of the environment has  
108 both spatial (in the sense of variability) and temporal (in the sense of instability) dimensions. The offspring thus usually inhabit an  
109 environment different from that of their parents due to their dispersal in time and/or space. Changes in the abiotic environment could  
110 be predictable (e.g. cyclical) or unpredictable, and their intensity and frequency vary on different timescales. We are interested in  
111 ecological timescales in this study so we consider short-term unpredictably changing environments as the most abiotically  
112 heterogeneous.

113 Temporally and spatially highly changeable ephemeral and marginal habitats are especially abiotically heterogeneous  
114 environments (see e.g. Pejler, 1995). However, most of the surface terrestrial habitats are considerably abiotically heterogeneous. On  
115 the contrary, sheltered habitats such as caves, ground water reservoirs or soil environment are greatly abiotically homogenous. Such  
116 environments protect their inhabitants from solar radiation and buffer short-term fluctuations in outer environment (e.g. changes of  
117 temperature and humidity), protecting their inhabitants from the direct impacts of such changes (Wallwork, 1970; Farrar, 1978, 1990,  
118 1998; Krivolutsky & Druk, 1986; Lavelle & Spain, 2003; Devetter & Scholl, 2014). Most changes in soil matrix are much slower in  
119 comparison with surface habitats (Lavelle & Spain, 2003). The abiotic homogeneity of soil environment further increases with the  
120 depth of the soil horizon. For example, there is a specific depth of soil horizon in each geographical region under which the  
121 temperature is perennially stable, depending on its latitude, altitude and other climatic factors (Wallwork, 1970; Lavelle & Spain, 2003;  
122 Coleman et al., 2004; Paul, 2007). The buffering effect of soil on moisture fluctuations also increases with depth (see e.g. Quesada et

123 al., 2004). Moreover, soils of certain biomes (especially forest soils) are temporally abiotically more homogeneous than soils of other  
124 biomes (see e.g. Siepel, 1994, 1996).

125         Regarding aquatic environments, freshwater habitats and coastal areas are the most abiotically heterogeneous (Sheldon, 1996).  
126 The decrease of abiotic heterogeneity with increasing depth is also expected—water masses buffer surface environmental changes in a  
127 similar way to soil (see e.g. Etter et al., 2005). Certain extreme environments that are temporally stable (e.g. hot springs or subsurface  
128 cavities) are also very abiotically homogeneous (Bell, 1982), but this does not apply to all environments referred to as extreme.

129         In a similar way to the biotic heterogeneity of the environment, also the abiotic one might be reduced in the populations of  
130 organisms producing durable resting stages. Such an adaptation enables them to survive unfavourable fluctuations of an abiotic  
131 environment and promotes colonization of new habitats (see e.g. Wilson, 2011). On the other hand, mobility probably does not  
132 strongly affect the abiotic environmental heterogeneity that the organisms experience. Mobile organisms might hypothetically  
133 experience more different abiotic conditions in their life, but they can also easily stick with those most suitable for them. The  
134 geographical trend of increasing abiotic heterogeneity with increasing latitude and altitude might be expected to occur on global scale  
135 (Hörandl, 2006, 2009; Vrijenhoek & Parker, 2009). However, it is noteworthy that such a trend might be countered by an opposite  
136 trend of the decreasing biotic heterogeneity mentioned above in its effects on sexual and asexual species (and *vice versa*). All the  
137 expectations mentioned above need not apply absolutely, but may serve as useful leads in judging the environmental heterogeneity of  
138 various organisms if their peculiarities are taken into account.

139

## 140 **Supplemental review of AA ecology**

### 141 **Bdelloidea**

142 Bdelloidea is a clade of hundreds of  $\mu\text{m}$  sized rotifers associated with semi-terrestrial, freshwater and soil environments (Ricci &  
143 Balsamo, 2000; Welch et al., 2009). Members of the ancient asexual group Bdelloidea inhabit most freshwater surface habitats, but are  
144 sometimes found also in brackish water and marginally in seawater (De Smet, 2002). Among freshwater environments, Bdelloidea  
145 dominate in biotically homogeneous marginal habitats with a reduced number of parasites, predators and competitors in contrast to its  
146 sexual control Monogononta (Ricci, 1987; Pejler, 1995; Ricci & Balsamo, 2000; Welch et al., 2009). They are exclusively benthic or  
147 sedentary (Koste & Shiel, 1986; Ricci & Balsamo, 2000), which indicates reduced biotic heterogeneity in contrast with sexual control.  
148 Monogononta are not only sedentary, but also obligately or facultatively planktonic and several of their species are clearly marine  
149 (Pejler, 1995). Concerning the biotically and abiotically homogeneous soil environment, Bdelloidea far outnumber their sexual  
150 control there (Pejler, 1995). Bdelloidea overwhelmingly dominate among soil rotifers and rotifers associated with mosses (Bryophyta)  
151 and lichens (Pejler, 1995; Scholl & Devetter, 2013; Devetter & Scholl, 2014), reaching up to 95 % prevalence (Donner, 1975).  
152 Moreover, Bdelloidea are almost exclusive among rotifers in high mountain soil (at least in Himalayas—Devetter M., pers. comm.  
153 2015). Abiotically homogeneous groundwater reservoirs are inhabited both by Monogononta and Bdelloidea. However, these habitats  
154 are poorly explored and observed species were probably transported there recently (Pejler, 1995). Bdelloidea are almost completely  
155 absent from biotically heterogeneous ancient lakes (e.g. Baikal) with complex ecosystems and intensive biotic interactions (predators,  
156 parasites and competitors). Sexual Monogononta overwhelmingly dominates here (Martens & Schön, 2000; Schön & Martens, 2004).  
157 Anhydrobiosis, i.e. drying into the state of durable resting stages, is the key ability of Bdelloidea from the ecological  
158 viewpoint. It enables Bdelloidea to avoid unpredictable and unfavourable conditions in its surrounding environment. Bdelloidea often  
159 inhabit objectively abiotically very heterogeneous environments, but activate only under the most suitable conditions (Pilato, 1979;  
160 Ricci, 2001). Anhydrobiosis thus makes them experience only favourable conditions and makes their environment subjectively highly  
161 abiotically homogeneous. Moreover, anhydrobiosis enables them to get rid of parasites (Wilson & Sherman, 2010; Wilson, 2011) and

162 effectively disperse in space and time (Caceres & Soluk, 2002), which may also reduce the biotic heterogeneity of environment they  
163 experience. Anhydrobiosis is also tightly connected to other specific characteristics of Bdelloidea—exceptionally intensive horizontal  
164 gene transfer (Gladyshev, Meselson & Arkipova, 2008; Debortoli et al., 2016), frequent repairs of DNA double-strand breaks and  
165 exceptional resistance to radiation (Gladyshev & Meselson, 2008) and starving (Ricci & Perletti, 2006). Intensive horizontal gene  
166 transfer is probably the reason for the relatively large genetic differences among clades of soil Bdelloidea that inhabit environments  
167 that distance from tens to hundreds of meters, as observed by Robeson et al. (2011). This alternative mode of genetic exchange was  
168 also proposed as an explanation for their ancient asexuality, substituting for their ability of genetic exchange during sexual processes  
169 (Boschetti et al., 2011; Gladyshev et al., 2008; Debortoli et al., 2016; Schwander, 2016)<sup>2</sup>. However, Bdelloidea are extremely  
170 phenotypically conservative (Pilato, 1979) despite their intensive horizontal gene transfers, which supports the primacy of  
171 homogeneous environment in the long-term maintenance of their asexuality. Sexual Monogononta does not have the ability of  
172 anhydrobiosis. They only produce mictic eggs at the end of the season, durable resting stages that serve for the survival of predictable  
173 periods of unfavourable conditions (Ricci, 2001). The character of the environment that they subjectively experience is thus much  
174 more biotically and abiotically heterogeneous.

175         It is noteworthy that Bdelloidea are ecologically more successful in thermally extreme environments. Both Monogononta and  
176 Bdelloidea are found in polar regions (Dartnall, 1983; Pejler, 1995; Sohlenius & Bostrom, 2005; Jungblut et al., 2012). However,  
177 Bdelloidea—especially *Philodina gregaria*—reaches much higher population densities and form growths sized up to several m<sup>2</sup> in  
178 these habitats (Dartnall, 1983; Pejler, 1995). Bdelloidea also reach much larger abundances than Monogononta in polar habitats  
179 (Janiec, 1996). These habitats are biotically very homogeneous because of reduced biotic interactions. They are also experienced as

---

<sup>2</sup> The role of horizontal gene transfer in bdelloid rotifers as a substitution for sexual processes remains intensively discussed. On the one hand, it was proposed that bdelloids in fact experience rare sex (Signorovitch et al., 2015; 2016), but on the other that the observed genetic exchange is best explained by intensive horizontal gene transfer (Debortoli et al., 2016; Flot et al., 2016). Due to the strong evidence supporting the absence of amfimixis in Bdelloidea (see table S1), we incline to think that Bdelloidea do not experience standard sexual processes (nevertheless, see Signorovitch et al., 2015; 2016; Debortoli et al., 2016; Flot et al., 2016). In either case, the rate of horizontal gene transfer in bdelloid rotifers is extraordinary high and probably tightly connected to their long-term survival in asexual state (Schwander, 2016).

180 very abiotically homogeneous by Bdelloidea because of their ability to survive adverse conditions in anhydrobiotic state. Bdelloidea  
181 are also more successful in comparison with their sexual control at high temperatures. Issel (1900, 1901) observed *Philodina roseola*  
182 in Italian hot springs at temperatures up to 46 °C. He concluded that *Philodina roseola* is specialized to high temperatures and  
183 dominates over sparse members of Monogononta above 40 °C. Pax and Wulfert (1941) reached similar conclusions in their research  
184 of central European hot springs. This pattern is further supported by environmental sequencing of hot springs in Alaska (McDermott  
185 & Skorupa, 2011). Despite the limitations of this study—for example, the authors could not distinguish the sequences of active living  
186 individuals from sequences of inactive individuals, dead specimens or contamination—the sequences of Bdelloidea, specifically  
187 *Philodinidae*, overwhelmingly dominated in springs with temperatures above 40 °C. The habitats of hot springs are abiotically stable  
188 and thus abiotically very homogeneous. Moreover, the number of competitors, predators and parasites decreases at high temperatures,  
189 which makes these environments biotically very homogeneous.

190 Bdelloidea and Monogononta predominantly feed by filtering surrounding water for small organic particles. Rarely, some  
191 sedentary representatives graze nutrients from nearby surfaces or drill through algal cell walls and suck its cytoplasm. However, there  
192 are no active predators among Bdelloidea in contrast to Monogononta (Ricci & Balsamo, 2000). The only single exception seems to  
193 be *Abrotrocha carnivora* (Ricci et al., 2001). None of two compared groups comprise parasites.

194 Taken together, Bdelloidea dominate over their sexual control in marginal habitats with reduced biotic heterogeneity.  
195 Anhydrobiosis shields its representatives from unfavourable conditions of their abiotic environment and consequent selection.  
196 Bdelloidea thus experience even abiotically homogeneous environment. Moreover, anhydrobiosis protects them to a certain degree  
197 even from the unfavourable consequences of intensive biotic pressures—it enables Bdelloidea to get rid of parasites and escape  
198 parasites, predators and competitors in time and space. Anhydrobiosis thus reduces even the experienced biotic heterogeneity of their  
199 environment. Bdelloidea dominate over their sexual control among rotifers inhabiting biotically and abiotically homogeneous soil  
200 environment. Bdelloidea are also ecologically very successful in biotically homogeneous polar regions with a low amount of biotic  
201 interactions (an environment which is for them also abiotically homogeneous due to anhydrobiosis) and abiotically stable hot springs



202 with reduced biotic pressures (abiotically and biotically homogeneous environments). Bdelloidea thus predominate over their sexual  
203 control even in objectively homogeneous environments. Cyclically sexual Monogononta dominate over Bdelloidea in water column  
204 and have numerous planktonic and sea representatives. Some of their species are predatory and thus experience stronger biotic  
205 pressures. They do not have the ability to undergo anhydrobiosis and thus live in subjectively much more heterogeneous environment  
206 than Bdelloidea. Monogononta also overwhelmingly prevail over Bdelloidea in ancient lakes with intensive biotic interactions. In  
207 conclusion, Bdelloidea are associated with biotically and abiotically more homogeneous environments than their sexual control  
208 Monogononta.

### 209 **Darwinuloidea**

210 Darwinulidae is the only extant member of superfamily Darwinuloidea. It is a group of hundreds of  $\mu\text{m}$  sized ostracods (Schön  
211 et al., 2009). Darwinulidae are present in most aquatic habitats including marine (see e.g. Martens et al., 1998a). In a similar way to  
212 Bdelloidea, Darwinulidae are also predominantly associated with biotically homogeneous marginal and semi-terrestrial habitats or  
213 springs and biotically and abiotically homogeneous interstitial and soil (Schön et al., 1998; Pinto et al., 2005; Pieri et al. 2009; Schön  
214 et al., 2009). However, the sexual control of Darwinulidae, Cypridoidea, is also present in the same environments and Darwinulidae  
215 does not seem to prevail there over its sexual control. Some representatives of Cypridoidea are planktonic (Pokorný, 1965), whereas  
216 all representatives of Bdelloidea are exclusively benthic or sedentary (Schön et al. 1998, 2009; Pinto et al. 2005; Pieri et al. 2009).  
217 This indicates a reduced abiotic heterogeneity of their environment.

218 Darwinulidae are able to survive unfavourable conditions (drought, low temperatures etc.) in an inactive state of torpor  
219 (Carbonel et al., 1988). This ability may be superficially analogical to anhydrobiosis of Bdelloidea in its ecological consequences, but  
220 does not enable Darwinulidae to survive such severe conditions. In any case, the environment is also experienced as subjectively  
221 abiotically homogeneous by Darwinulidae at least to some degree. The ability to undergo torpor may also outweigh the absence of  
222 durable eggs that are present in the sexual control (Horne, 1993). However, numerous representatives of Cypridoidea are also capable  
223 of torpor and this ability is thus not exclusive to AA Darwinulidae in contrast to Bdelloidea-Monogononta (Delorme & Donald, 1969;

224 Carbonel et al., 1988; Retrum et al., 2011). Moreover, even representatives unable to enter a state of torpor are able to survive short  
225 periods of drought (Retrum et al., 2011). A Darwinulidae-specific brooding pouch is also an important part of resistance to  
226 unfavourable conditions of biotic and abiotic environments. It protects offspring from fluctuations of abiotic environmental factors  
227 and predators and also facilitates the dispersal abilities of Darwinulidae (Martens, 1998). Its presence may decrease the experienced  
228 biotic and abiotic heterogeneity of the environment.

229 Darwinulidae are not predominantly associated with permanent bodies of water. However, the individuals that inhabit them  
230 prefer hypoxic depths with lower biotic pressures (Rossi et al., 2002; Smith et al., 2006; Schön et al., 2009). Such depths are also  
231 optimal for dispersion with the help of water birds, but the depth preference of Darwinulidae does not seem to be selected primarily  
232 for this reason. Despite the fact that Darwinulidae have numerous preadaptations hypothetically promoting its dispersal (see e.g.  
233 Delorme & Donald, 1969; Martens, 1998; Frisch et al., 2007; Retrum et al., 2011), they are probably not good colonizers (Malmqvist  
234 et al., 1997; Martens et al., 2008b). Another explanation, for example, the absence of predators, predators and competitors in hypoxic  
235 areas and consequently reduced biotic heterogeneity, seems more plausible. Darwinulidae are also nearly absent from ancient lakes  
236 with strong biotic pressures, which are dominated by sexual ostracods (Schön & Martens, 2004). A similar pattern also applies to  
237 groundwater (Schön & Martens, 2004; Martens et al., 2008a). These environments are highly biotically heterogeneous.

238 Darwinulidae are not more prevalent or ecologically successful in thermally extreme environments in comparison with their  
239 sexual control. The lower limits of their activity lie around 0 °C, which is similar to Cypridoidea (McLay, 1978; Tudorancea et al.,  
240 1979; Külköylüoğlu & Vinyard, 2000; Bunbury & Gajewski, 2009). The upper limits of their activity are inferior to those of  
241 Cypridoidea. Some species of Cypridoidea are specialized to high temperatures and activate even at 54 °C (Külköylüoğlu et al., 2003).  
242 Other Cypridoidea representatives were observed as ecologically successful at temperatures around 50 °C (Moniez, 1893; Brues,  
243 1932; Klie, 1939; Jana & Sarkar, 1971; Wickstrom & Castenholz, 1985). Darwinulidae only rarely activate at temperatures above 35  
244 °C (Brues, 1932; Reeves et al., 2007) and their upper thermal limit of activity lies around 40-50 °C (Menzel, 1923; Ponyi, 1992). They

245 are thus not associated with thermally more extreme biotically or abiotically homogeneous environments in comparison with their  
246 sexual control.

247 Another characteristic of Darwinulidae is that they are highly resilient to starvation (Rossi et al., 2002) and only rarely  
248 predated (Ranta, 1979). Moreover, ostracods in general are rarely and weakly parasitized (Schön et al., 2009; Bruvo et al., 2011),  
249 which may be an effective preadaptation to their frequent transitions to asexuality—young asexual lineages are common also in  
250 Cypridoidea. All of this indicates that they experience reduced biotic heterogeneity of their environment. The pattern of geographical  
251 parthenogenesis, i.e. increasing number of asexual lineages with latitude and altitude, is also often commented in ostracods. The  
252 distribution in higher latitudes and altitudes is associated with increased abiotic heterogeneity and decreased biotic heterogeneity.  
253 However, this pattern does not have general applicability in the compared taxa (Bell, 1982: 265-266; Schwander & Crespi, 2009). It  
254 applies only to certain species of Cyprididae that consist of sexual and asexual lineages (Horne et al., 1998).

255 Environmental correlates of AA Darwinulidae and its sexual control Cypridoidea are similar to Bdelloidea-Monogononta, but  
256 their differences are not nearly as distinct. Biotically and abiotically very homogeneous environments are inhabited both by the AA  
257 group and its sexual control in many ways. There are only few absolute differences between the compared groups. One reason for this  
258 “fogginess” might be the large disproportion in the number of species in the two compared clades. Sexual Cypridoidea comprise more  
259 than 1500 described species, whereas Darwinulidae are comprised by only about 40 (Martens et al., 1998a, b; Rossetti et al., 2011).  
260 Another possible reason is frequent transition to asexuality in certain species of Cypridoidea and consequent presence of many young  
261 asexual lineages (Martens, 1998). Such young asexual lineages may have transient advantage over sexual species in numerous  
262 environments that are also associated with the AA lineage (Martens, 1998).

263 Taken together, Darwinulidae tend to be associated with biotically homogeneous marginal habitats in a similar way to  
264 Bdelloidea-Monogononta. Moreover, they also experience such habitats as subjectively abiotically homogeneous because of their  
265 ability to undergo torpor. However, the same environments are equally inhabited by the sexual control Cypridoidea that is also capable  
266 of torpor. Darwinulidae thus does not seem to be associated with abiotically more homogeneous environments than their sexual

267 control. The same pattern applies to the association with abiotically and biotically homogeneous soil habitats or the absence of  
268 predatory and parasitic lifestyle and lower overall parasitization that mark more biotically homogeneous environment—it is  
269 characteristic for both compared groups. However, Darwinulidae are exclusively benthic or sessile in contrast to their sexual control,  
270 which is associated with a reduction of biotic heterogeneity. They are also nearly absent from the biotically complex environments of  
271 ancient lakes and are sparse in groundwater reservoirs that are both biotically heterogeneous. Species of Darwinulidae that inhabit  
272 stable water bodies such as lakes and rivers prefer hypoxic depths with reduced biotic stresses. Moreover, Darwinulidae are only  
273 under a weak pressure of predators and are resilient to starvation. All of that is associated with reduced biotic heterogeneity. In  
274 conclusion, ostracods are associated with markedly homogeneous environments in general. Darwinulidae in particular are associated  
275 with biotically more homogeneous environments in comparison with their sexual control. However, there is no clear difference in the  
276 abiotic heterogeneity of the environments Darwinulidae and their sexual control are associated with.

## 277 **Oribatidae**

278 Oribatidae is a diverse group of hundreds of  $\mu\text{m}$  sized mites (Norton & Behan-Pelletier, 2009). AA representatives of mites  
279 from the clade Oribatidae are predominantly associated with soil in contrast to their sexual controls. Moreover, their proportion  
280 increases with the depth of the soil horizon (Krivolutsky & Druk, 1986; Norton & Palmer, 1991; Karasawa & Hijii, 2008; Maraun et  
281 al., 2009; Devetter & Scholl, 2014). Soil is a biotically and abiotically more homogeneous environment in comparison with surface  
282 habitats. The upper layers of soil are abiotically relatively more changeable and characterized by more complex biotic interactions;  
283 biotic and abiotic heterogeneity further decreases with the depth of the soil horizon. This indicates an association of AA Oribatidae  
284 with biotically and abiotically homogeneous environments. On the other hand, sexual lineages of Oribatidae predominate in biotically  
285 and abiotically more heterogeneous arboreal habitats (Karasawa & Hijii, 2008; Maraun et al., 2009). Beyond that, AA representatives  
286 of Oribatidae are preferentially associated with abiotically more stable forest soils rather than changeable grassland soils (Krivolutsky  
287 & Druk, 1986; Siepel, 1994; but see also Devetter & Scholl, 2014 that proved stronger effect of seasonality in contrast to substrate and  
288 vegetation cover). There are almost no typical parasites and predators among AA Oribatidae, which may indicate a lower biotic

289 heterogeneity of their environment. They are saprophages, fungivores, or feed on algae and microorganisms. However, the same  
290 applies also to their sexual controls (Norton & Behan-Pelletier, 2009).

291 In the context of abovementioned characteristics, it is rather surprising that AA Oribatidae were not proven to be  
292 predominantly associated with biotically more homogeneous environments characterized by a reduced number of competitors and  
293 predators (Cianciolo & Norton, 2006). However, the study of Cianciolo and Norton (2006) might examine too narrow spectrum of  
294 their predators and parasites. Other experiments proved that AA representatives of Oribatidae are superior to sexual ones in abiotically  
295 homogenous environment with unlimited unstructured resources. Sexual Oribatidae were more successful in the presence of  
296 structured resources (Domes et al., 2007c; Maraun et al., 2012).

297 The possible geographical parthenogenesis of Oribatidae, i.e. a higher proportion of asexual lineages in higher latitudes and altitudes  
298 characterized by higher abiotic heterogeneity and lesser biotic heterogeneity, remains questionable. Some studies supported this  
299 pattern (Behan-Pelletier, 1997), but other evidence is very unclear (Norton & Palmer, 1991; Cianciolo & Norton, 2006).

300 Taken together, AA lineages of Oribatidae are predominantly associated with biotically and abiotically homogeneous soil  
301 environment in contrast to their sexual controls. Moreover, the proportion of AA lineages increases with the depth of the soil horizon  
302 that is associated with further reduction of biotic and abiotic heterogeneity. They are less prevalent in arboreal environments that are  
303 more abiotically changeable and characterized by stronger biotic pressures, i.e. abiotically and biotically more heterogeneous. AA  
304 Oribatidae are also preferentially associated with abiotically stable forest soils in contrast to more changeable grassland soils. There  
305 are no typical predators and parasites among AA Oribatidae, but the same also applies to their sexual controls. A direct association  
306 with more biotically homogeneous environments in soil remains questionable. However, they are more successful in environments  
307 with unstructured resources in contrast to sexual representatives. The geographical parthenogenesis of Oribatidae, potentially  
308 associated with increase of abiotic heterogeneity and decrease of biotic heterogeneity with latitude and altitude, remains an open  
309 question. In conclusion, AA Oribatidae seems to be affected mainly by abiotic conditions of environment, but generally inhabit both  
310 biotically and abiotically more homogeneous environments in comparison with their sexual controls.

311 **Other ancient asexual mites**

312           Endeostigmata is a group of hundreds of  $\mu\text{m}$  sized mites predominantly associated with soil and especially extreme soil  
313 habitats—deep soil or sand horizons, microbial crusts, extremely salty habitats, seashores and desert soils (Walter, 2009). Such  
314 habitats are expected to be biotically more homogeneous. AA Endeostigmata tend to be associated with deep soil horizons in contrast  
315 to their sexual controls. All of their sexual controls are associated with abiotically and biotically more heterogeneous environments,  
316 especially abiotically relatively changeable upper parts of the soil with more biotic interactions. The only exception from this rule is  
317 the clade comprising of Grandjeanicidae and Oechserchestidae that do not exhibit any differences in heterogeneity of their  
318 environment in comparison with their sexual control (Norton et al., 1993; Walter, 2001, 2009; Neher et al., 2009; Norton & Behan-  
319 Pelletier, 2009; Oconnor, 2009; Darby et al., 2011). A predatory lifestyle is very rare among AA Endeostigmata and they are never  
320 parasitic. They are mostly saprotrophs, or feed on fungi and microorganisms, which makes their environment less biotically  
321 heterogeneous. However, this is also true for their sexual controls among Endeostigmata (Walter, 2001, 2009; Neher et al., 2009). A  
322 group consisting of genera *Alicorhagia* and *Stigmalychus* is an exception from this pattern, because it is much less phenotypically  
323 variable than any possible sexual control. Some of these controls are large lineages outside of Endeostigmata that comprise even  
324 typical predators and parasites (Norton et al., 1993; Walter, 2001, 2009; Neher et al., 2009; Norton & Behan-Pelletier, 2009; Oconnor,  
325 2009; Darby et al., 2011). Taken together, their ecological patterns are similar to those of Oribatidae. They are just even less explored.

326           Trombidiformes is another diverse clade of hundreds of  $\mu\text{m}$  sized mites (Walter et al., 2009). Ecological patterns of AA  
327 lineages among Trombidiformes are analogical to those of Oribatidae and Endeostigmata (Kethley, 1989; Bochkov & Walter, 2007;  
328 Neher et al., 2009; Walter et al., 2009; Darby et al., 2011). However, they are also poorly explored. These AA mites are also  
329 predominately associated with biotically and abiotically homogeneous deep soil horizons and are not typically predators and parasites,  
330 which reduces the biotic heterogeneity of their environment (Norton et al., 1993; Neher et al., 2009; Walter et al., 2009; Darby et al.,  
331 2011). Their sexual controls from clade Prostigmata (and Sphaerolychidae in case of Lordalycidae), both alone and in any

332 combination (their phylogenetic position is unclear), are much more phenotypically disparate and comprise even typical predators and  
333 parasites (Neher et al., 2009; Norton et al., 1993; Walter et al., 2009; Darby et al., 2011).

334 Taken together, all abovementioned mite groups are poorly explored. However, if we can judge anything from the current  
335 knowledge of their ecology, it is that their AA lineages seem to be associated with biotically and abiotically more homogeneous  
336 environments. They are associated with soil and, in contrast to their sexual controls, especially deep soil horizons. Moreover,  
337 Trombidiformes, as well as *Alicorhagia* and *Stigmalychus*, are much less phenotypically variable than any of their sexual controls that  
338 comprise even predators and parasites and inhabit more biotically and abiotically heterogeneous environments. With the exception of  
339 Oehserchestidae that doesn't inhabit environments of different heterogeneity than their sexual control, we can conclude that AA mite  
340 lineages are always associated with more biotically and abiotically homogeneous environments than their sexual controls.

#### 341 ***Vittaria***

342 *Vittaria appalachiana* is an mm sized fern (Polypodiophyta) from the family Vittariaceae that forms growths up to several m<sup>2</sup>  
343 large (Farrar, 1978; Farrar & Mickel, 1991). It is unique among ferns by abandoning the stage of sexual gametophyte and surviving as  
344 purely an asexual sporophyte. *Vittaria appalachiana* is rather a group of related asexual lineages as opposed to a single species—  
345 individual populations are genetically and phenotypically variable (Farrar, 1978, 1985, 1990). *Vittaria appalachiana* is associated  
346 almost exclusively with caves, crevices and rock excesses that buffer fluctuations of outer temperature and humidity (Farrar, 1978,  
347 1985, 1990). Populations of *Vittaria appalachiana* thus inhabit geologically and ecologically stable habitats (Farrar, 1998) that are  
348 characterized by low abiotic heterogeneity. Moreover, extremely low levels of light in its habitats lead to a strong reduction of  
349 interspecific competition (Farrar, 1978, 1998) and lower biotic heterogeneity. *Vittaria appalachiana* also inhabit higher latitudes in  
350 comparison with any proposed sexual control (Farrar, 1998, 1978; Farrar & Mickel, 1991), which could lead to a reduction of biotic  
351 heterogeneity. A possible co-occurring increase of abiotic heterogeneity with latitude probably does not affect *Vittaria appalachiana*  
352 strongly because of its buffering habitats. The association of *Vittaria appalachiana* with biotically homogeneous environments is  
353 further supported by the fact that individual plants are highly susceptible to parasitization and competition (as well as antibiotics and

354 sterilisation), as was observed during attempts to grow them in a laboratory (Caponetti et al., 1982). Its sexual controls do not exhibit  
355 these characteristics. Sporophytes of all proposed sexual controls grow epiphytically on decaying wood or trees in lower latitudes.  
356 Their habitats are thus more exposed to abiotic conditions of environment, biotically and abiotically more heterogeneous (Farrar,  
357 1978, 1990; Farrar & Mickel, 1991).

358 Taken together, caves and rock overhangs inhabited by *Vittaria appalachiana* in contrast to all proposed sexual controls are  
359 geologically and ecologically stable, maintain stable level of humidity and protect their inhabitants from fluctuations of temperature.  
360 These habitats are thus abiotically very homogeneous. Extremely low levels of light in these habitats also strongly reduce any  
361 interspecific competition. This leads, as well as higher latitudes inhabited by *Vittaria appalachiana*, to lower biotic heterogeneity of  
362 its environment in comparison with any sexual control. Moreover, the individuals of *Vittaria appalachiana* are highly susceptible to  
363 infections and are not good competitors. This also points to their association with biotically homogeneous environments. In  
364 conclusion, *Vittaria appalachiana* is associated with more biotically and abiotically homogeneous environment than any of its  
365 proposed sexual controls.

### 366 ***Timema***

367 *Timema* is a genus of cm sized herbivorous phasmatodean (Phasmatodea) insects that inhabit chaparral vegetation of western  
368 parts of North America (Vickery, 1993; Sandoval et al., 1998). Sexual, young sexual and AA lineages of the phasmatodean  
369 (Phasmatodea) genus *Timema* do not differ much in their ecology. Two of three AA species have narrower food spectra in comparison  
370 with their sexual controls. This could hypothetically lead to decreased competition and consequently a biotically more homogeneous  
371 environment. However, a third AA species, *Timema tahoe*, share the same host plant as its sexual control *Timema bartmani* (Law &  
372 Crespi, 2002b). None of the AA species are more specialized in comparison with their sexual control. In fact, they are markedly  
373 similar in terms of their phenotype (Sandoval et al., 1998). The areas of AA *Timema* species are usually geographically separated from  
374 areas of other members of the genera, mostly by a great distance (Sandoval et al., 1998; Law & Crespi, 2002b). This may lead to  
375 decreased interspecific competition with other members of the genera (especially species with the same or overlapping food niche)



376 and consequentially a decrease of the biotic heterogeneity of their environment. However, the areas of AA *Timema monikensis* and its  
377 sexual control *Timema chumash* overlap (Law & Crespi, 2002a), casting doubt on this possibility. On the other hand, young asexual  
378 species of the genera usually border and partially overlap their areas with sexual species of *Timema*, including their sister species  
379 (Law & Crespi, 2002b). Young asexual species of *Timema* also inhabit higher latitudes in comparison with their sexual relatives,  
380 which may indicate abiotically more heterogeneous but biotically more homogeneous environment. However, this pattern does not  
381 apply to AA species of *Timema* (Law & Crespi 2002a, b). Two of three AA species have markedly northern areas in comparison with  
382 their sexual controls. However, other species of *Timema*, including sexual ones, are distributed into even higher latitudes (Law &  
383 Crespi, 2002b).

384         Taken together, it doesn't seem that the environment inhabited by AA members of *Timema* is biotically or abiotically more  
385 homogeneous or heterogeneous in comparison with their sexual controls. Some indices, e.g. the separation of areas populated by AA  
386 members of the genera from areas populated by other members, point to reduced interspecific competition and possibly a reduced  
387 biotic heterogeneity of their environment. The distribution of AA timemas in higher latitudes in comparison with sexual controls may  
388 have similar consequences. However, possible indices of differences among the environmental heterogeneity of AA members of  
389 *Timema* and their sexual controls are highly unclear. In conclusion, available evidence is insufficient to identify any consistent  
390 differences in biotic and abiotic heterogeneity of the environment of AA members of *Timema* and their sexual controls.

### 391 ***Lasaea***

392         *Lasaea* is a genus of mm sized intertidal bivalves (Bivalvia) (Morton et al., 1957). Its AA representatives have global  
393 distribution, whereas sexual controls are limited only to the shores of Australia and Tasmania (Ó Foighil & Smith, 1995; Ó Foighil &  
394 Thiriot-Quievreux, 1999; Taylor & Foighil, 2000). AA representatives of *Lasaea* are thus distributed to higher latitudes with  
395 hypothetically a reduced biotic heterogeneity and an increased abiotic heterogeneity. However, they are present also in lower latitudes.  
396 The main reason for this geographical pattern is thus probably not the hypothetical difference in environmental heterogeneity, but the  
397 excellent dispersal ability of directly developing AA members of *Lasaea* (Ó Foighil, 1989). However, one of two sexual lineages of

398 this genus, *Lasaea colmani*, also has direct development (Ó Foighil & Smith, 1995). It is thus difficult to make any conclusions on the  
399 basis of the association between their ancient asexuality with their direct development.

400 *Lasaea* is not associated with environments of a distinctly homogeneous character. It is associated with areas of tidal zone  
401 between the mean high water spring and low water spring tides. Its individuals are associated especially with shallow crevices and  
402 shaded stone recesses, empty barnacles and tufts of tidal vegetation (Morton et al., 1957). This boundary ecosystem is abiotically  
403 rather changeable, which may lead to decreased competition, predation and parasitization. However, *Lasaea* do not greatly experience  
404 reduced biotic pressures. Its individuals are associated with numerous marine plants, isopods (Isopoda), springtails (Collembola),  
405 mites (Acari), beetles (Coleoptera), pseudoscorpions (Pseudoscorpiones) and gastropods (Gastropoda). They are also accompanied by  
406 other bivalves in the lower parts of tidal zone (Morton et al., 1957). Amenzalous filamentous cyanobacteria and green filamentous  
407 algae (e.g. *Entocladia*) often grow on their shells and erode them (Morton et al., 1957). Species of genus *Lasaea* feed by filtering  
408 detritus and are not typical predators and parasites. However, these characteristics applies both to their AA and sexual lineages  
409 (Morton et al., 1957).

410 It is noteworthy that both AA and sexual lineages of *Lasaea* are not able to breath atmospheric oxygen in contrast to numerous  
411 tidal invertebrates. They tightly close their shells in unfavourable conditions (e.g. drought) and become inactive. Individuals of *Lasaea*  
412 are able to survive up to several days in this inactive state (according to Morton et al., 1957, up to 12 days). This ability primarily  
413 serves for their survival in the changeable conditions of tidal zone. However, it may also enable *Lasaea* to activate only under  
414 favourable conditions and consequently make its environment subjectively more homogeneous. Thus, it may be a preadaptation  
415 analogical to the anhydrobiosis of Bdelloidea or the torpor of Darwinulidae. However, thorough exploration of the hypothetical  
416 differences between AA and sexual lineages of Darwinulidae is needed to verify this hypothesis.

417 Taken together, the situation in genus *Lasaea* is the most complicated of all the studied AA groups from the viewpoint of  
418 present comparative study. *Lasaea* is highly understudied in this regard. Published literature does not offer enough information to  
419 investigate possible ecological differences among its AA lineages and sexual controls. In conclusion, available evidence is insufficient

420 to identify any consistent differences in the biotic and abiotic heterogeneity of the environment of AA members of *Lasaea* and their  
421 sexual controls.

422

423 **References**

- 424 Abushik A. 1990. *Manual of the microfauna of the USSR*. Leningrad, USSR: VSE-GEI, NEDRA.
- 425 Adl SM, Simpson AG, Lane CE, Lukeš J, Bass D, Bowser SS, Brown MW, Burki F, Dunthorn M, Hampl V, Heiss A, Hoppenrath M,  
426 Lara E, le Gall L, Lynn DH, McManus H, Mitchell EAD, Mozley-Stanridge SE, Parfrey LW, Pawlowski J, Rueckert S,  
427 Shadwick L, Schoch CL, Smirnov A, Spiegel F. 2012. The revised classification of eukaryotes. *Journal of Eukaryotic*  
428 *Microbiology* 59: 429-514. Afifi A, Hassan M, Nawar M. 1986. Notes on the biology and feeding habits of *Protogamasellus*  
429 *minutus* (Hafez, El-Badry & Nasr (Acari: Gamasida: Ascidae). *Bulletin of the Entomological Society of Egypt* 66: 251-259.
- 430 Andersson J. 2012. Double peaks reveal rare diplomonad sex. *Trends in Parasitology* 28: 46-52.
- 431 Arkhipova I, Meselson M. 2000. Transposable elements in sexual and ancient asexual taxa. *Proceedings of the National Academy of*  
432 *Sciences of the United States of America* 97: 14473-14477.
- 433 Arkhipova I, Meselson M. 2005. Diverse DNA transposons in rotifers of the class Bdelloidea. *Proceedings of the National Academy*  
434 *of Sciences of the United States of America* 102: 11781-11786.
- 435 Arkhipova I, Morrison H. 2001. Three retrotransposon families in the genome of *Giardia lamblia*: Two telomeric, one dead.  
436 *Proceedings of the National Academy of Sciences of the United States of America* 98: 14497-14502.
- 437 Barraclough TG, Fontaneto D, Ricci C, Herniou EA. 2007. Evidence for inefficient selection against deleterious mutations in  
438 cytochrome oxidase I of asexual bdelloid rotifers. *Molecular Biology and Evolution* 24: 1952-1962.
- 439 Baxevanis A, Kappas I, Abatzopoulos T. 2006. Molecular phylogenetics and asexuality in the brine shrimp *Artemia*. *Molecular*  
440 *Phylogenetics and Evolution* 40: 724-738.
- 441 Beauchamp K. 1986. Reproductive ecology of the brooding, hermaphroditic clam *Lasaea subviridis*. *Marine Biology* 93: 225-235.
- 442 Behan-Pelletier V. 1997. Oribatid mites of the Yukon. In: H.V. Danks HV, Downes JA, eds. *Insects of the Yukon*. Ottawa: Biological  
443 Survey of Canada (Terrestrial Arthropods), 115-149.
- 444 Bell G. 1982. *The masterpiece of nature: the evolution and genetics of sexuality*. London, UK: Croom Helm.

- 445 Bennett R, Johnson A. 2003. Completion of a parasexual cycle in *Candida albicans* by induced chromosome loss in tetraploid strains.  
446 *Embo Journal* 22: 2505-2515.
- 447 Bernander R, Palm J, Svard S. 2001. Genome ploidy in different stages of the *Giardia lamblia* life cycle. *Cellular Microbiology* 3: 55-  
448 62.
- 449 Berriman M, Ghedin E, Hertz-Fowler C, Blandin G, Renauld H, Bartholomeu D, Lennard N, Caler E, Hamlin N, Haas B, Bohme W,  
450 Hannick L, Aslett M, Shallom J, Marcello L, Hou L, Wickstead B, Alsmark U, Arrowsmith C, Atkin R, Barron A, Bringaud F,  
451 Brooks K, Carrington M, Cherevach I, Chillingworth T, Churcher C, Clark L, Corton C, Cronin A, Davies R, Doggett J,  
452 Djikeng A, Feldblyum T, Field M, Fraser A, Goodhead I, Hance Z, Harper D, Harris B, Hauser H, Hostetter J, Ivens A, Jagels  
453 K, Johnson D, Johnson J, Jones K, Kerhornou A, Koo H, Larke N, Landfear S, Larkin C, Leech V, Line A, Lord A, MacLeod  
454 A, Mooney P, Moule S, Martin D, Morgan G, Mungall K, Norbertczak H, Ormond D, Pai G, Peacock C, Peterson J, Quail M,  
455 Rabinowitsch E, Rajandream M, Reitter C, Salzberg S, Sanders M, Schobel S, Sharp S, Simmonds M, Simpson A, Talton L,  
456 Turner C, Tait A, Tivey A, Van Aken S, Walker D, Wanless D, Wang S, White B, White O, Whitehead S, Woodward J,  
457 Wortman J, Adams M, Embley T, Gull K, Ullu E, Barry J, Fairlamb A, Opperdoes F, Barret B, Donelson J, Hall N, Fraser C,  
458 Melville S, El-Sayed N. 2005. The genome of the African trypanosome *Trypanosoma brucei*. *Science* 309: 416-422.
- 459 Bettarel Y, Bouvy M, Dumont C, Sime-Ngando T. 2006. Virus-bacterium interactions in water and sediment of West African inland  
460 aquatic systems. *Applied and Environmental Microbiology* 72: 5274-5282.
- 461 Biderre C, Mathis A, Deplazes P, Weber R, Metenier G, Vivares C. 1999. Molecular karyotype diversity in the microsporidian  
462 *Encephalitozoon cuniculi*. *Parasitology* 118: 439-445.
- 463 Bi K, Bogart JP. 2010. Time and time again: unisexual salamanders (genus *Ambystoma*) are the oldest unisexual vertebrates. *Bmc*  
464 *Evolutionary Biology* 10.
- 465 Birky C. 2010. Positively negative evidence for asexuality. *Journal of Heredity* 101: S42-S45.
- 466 Birky C, Wolf C, Maughan H, Herbertson L, Henry E. 2005. Speciation and selection without sex. *Hydrobiologia* 546: 29-45.

- 467 Blackman R, De Boise E, Czylok A. 2001. Occurrence of sexual morphs in *Trama troglodytes* von Heyden, 1837 (Hemiptera,  
468 Aphididae). *Journal of Natural History* 35: 779-785.
- 469 Blackman R, Spence JM, Normark B. 2000. High diversity of structurally heterozygous karyotypes and rDNA arrays in  
470 parthenogenetic aphids of the genus *Trama* (Aphididae: Lachninae). *Heredity* 84: 254-260.
- 471 Blanc D, Nicholls R, Sargeant P. 1989. Experimental production of new zymodemes of *Entamoeba histolytica* supports the  
472 hypothesis of genetic exchange. *Transactions of the Royal Society of Tropical Medicine and Hygiene* 83: 787-790.
- 473 Blanc G, Duncan G, Agarkova I, Borodovsky M, Gurnon J, Kuo A, Lindquist E, Lucas S, Pangilinan J, Polle J, Salamov A, Terry A,  
474 Yamada T, Dunigan D, Grigoriev I, Claverie J, Van Etten J. 2010. The *Chlorella variabilis* NC64A genome reveals adaptation  
475 to photosymbiosis, coevolution with viruses, and cryptic sex. *Plant Cell* 22: 2943-2955.
- 476 Bloszyk J, Adamski Z, Napierala A, Dylewska M. 2004. Parthenogenesis as a life strategy among mites of the suborder Uropodina  
477 (Acari: Mesostigmata). *Canadian Journal of Zoology-Revue Canadienne De Zoologie* 82: 1503-1511.
- 478 Bloszyk J, Szymkowiak P. 1996. *Trachytes kaliszewskii*, n. sp. (Acari: Uropodina), from the Great Basin (Utah, USA), with remarks  
479 on the habitats and distribution of the members of the genus *Trachytes*. *Great Basin Naturalist* 56: 59-72.
- 480 Bochkov A, Walter D. 2007. The life-cycle of *Pomerantzia philippina* sp. n. (Prostigmata: Pomerantziidae) described from the  
481 Philippines. *Acarina* 15: 159-170.
- 482 Bode S, Adolfsson S, Lamatsch D, Martins M, Schmit O, Vandekerkhove J, Mezquita F, Namiotko T, Rossetti G, Schön I, Butlin R,  
483 Martens K. 2010. Exceptional cryptic diversity and multiple origins of parthenogenesis in a freshwater ostracod. *Molecular*  
484 *Phylogenetics and Evolution* 54: 542-552.
- 485 Bogart JP, Bi K, Fu JZ, Noble DWA, Niedzwiecki J. 2007. Unisexual salamanders (genus *Ambystoma*) present a new reproductive  
486 mode for eukaryotes. *Genome* 50: 119-136.
- 487 Boschetti C, Pouchkina-Stantcheva N, Hoffmann P, Tunnacliffe A. 2011. Foreign genes and novel hydrophilic protein genes  
488 participate in the desiccation response of the bdelloid rotifer *Adineta ricciae*. *Journal of Experimental Biology* 214: 59-68.

- 489 Bratbak G, Egge JK, Heldal M. 1993. Viral mortality of the marine alga *Emiliania huxleyi* (Haptophyceae) and termination of algal  
490 blooms. *Marine Ecology Progress Series* 93: 39-48.
- 491 Brues C. 1932. Further studies on the fauna of North American hot springs. *Proceedings of the American Academy of Arts and*  
492 *Sciences* 67: 185-303.
- 493 Bruvo R, Adolfsson S, Symonova R, Lamatsch D, Schön I, Jokela J, Butlin R, Muller S. 2011. Few parasites, and no evidence for  
494 *Wolbachia* infections, in a freshwater ostracod inhabiting temporary ponds. *Biological Journal of the Linnean Society* 102:  
495 208-216.
- 496 Buckwold VE. 1994. Viral-induced extinctions unlikely. *Nature* 368: 562.
- 497 Bunbury J, Gajewski K. 2009. Biogeography of freshwater ostracodes in the Canadian arctic archipelago. *Arctic* 62: 324-332.
- 498 Butlin R, Schön I, Martens K. 1998. Asexual reproduction in nonmarine ostracods. *Heredity* 81: 473-480.
- 499 Caceres CE, Soluk DA. 2002. Blowing in the wind: a field test of overland dispersal and colonization by aquatic invertebrates.  
500 *Oecologia* 131: 402-408.
- 501 Caponetti J, Whitten M, Beck M. 1982. Axenic culture and induction of callus and sporophytes of the Appalachian *Vittaria*  
502 gametophyte. *American Fern Journal* 72: 36-40.
- 503 Carbonel P, Colin J, Danielopol D, Löffler H, Neustrueva I. 1988. Paleoecology of limnic ostracodes: a review of some major topics.  
504 *Palaeogeography Palaeoclimatology Palaeoecology* 62: 413-461.
- 505 Carlton J, Hirt R, Silva J, Delcher A, Schatz M, Zhao Q, Wortman J, Bidwell S, Alsmark U, Besteiro S, Sicheritz-Ponten T, Noel C,  
506 Dacks J, Foster P, Simillion C, Van de Peer Y, Miranda-Saavedra D, Barton G, Westrop G, Muller S, Dessi D, Fiori P, Ren Q,  
507 Paulsen I, Zhang H, Bastida-Corcuera F, Simoes-Barbosa A, Brown M, Hayes R, Mukherjee M, Okumura C, Schneider R,  
508 Smith A, Vanacova S, Villalvazo M, Haas B, Perteu M, Feldblyum T, Utterback T, Shu C, Osoegawa K, de Jong P, Hrdy I,  
509 Horvathova L, Zubacova Z, Dolezal P, Malik S, Logsdon J, Henze K, Gupta A, Wang C, Dunne R, Upcroft J, Upcroft P,

510 White O, Salzberg S, Tang P, Chiu C, Lee Y, Embley T, Coombs G, Mottram J, Tachezy J, Fraser-Liggett C, Johnson P. 2007.  
511 Draft genome sequence of the sexually transmitted pathogen *Trichomonas vaginalis*. *Science* 315: 207-212.

512 Carr M, Leadbeater B, Baldauf S. 2010. Conserved Meiotic Genes Point to Sex in the Choanoflagellates. *Journal of Eukaryotic*  
513 *Microbiology* 57: 56-62.

514 Carr M, Nelson M, Leadbeater B, Baldauf S. 2008. Three families of LTR retrotransposons are present in the genome of the  
515 choanoflagellate *Monosiga brevicollis*. *Protist* 159: 579-590.

516 Castagnonesereno P, Piotte C, Uijthof J, Abad P, Wajnberg E, Vanlerberghemasutti F, Bongiovanni M, Dalmaso A. 1993.  
517 Phylogenetic relationships between amphimictic and parthenogenetic nematodes of the genus *Meloidogyne* as inferred from  
518 repetitive DNA analysis. *Heredity* 70: 195-204.

519 Chapela I, Rehner S, Schultz T, Mueller U. 1994. Evolutionary history of the symbiosis between fungus-growing ants and their fungi.  
520 *Science* 266: 1691-1694.

521 Chaplin J, Hebert P. 1997. *Cyprinotus incongruens* (Ostracoda): an ancient asexual? *Molecular Ecology* 6: 155-168.

522 Chi J, Parrow M, Dunthorn M. 2014. Cryptic Sex in *Symbiodinium* (Alveolata, Dinoflagellata) is Supported by an Inventory of  
523 Meiotic Genes. *Journal of Eukaryotic Microbiology* 61: 322-327.

524 Cianciolo JM. 2009. Asexual species of oribatid mites do not have a local-scale colonization advantage over sexual species.  
525 *Evolutionary Ecology Research* 11: 43-55.

526 Cianciolo JM, Norton RA. 2006. The ecological distribution of reproductive mode in oribatid mites, as related to biological  
527 complexity. *Experimental and Applied Acarology* 40: 1-25.

528 Coleman DA, Crossley DA, Hendrix PF. 2004. *Fundamentals of Soil Ecology, Second edition*. USA: Elsevier Academic Press.

529 Cooper M, Adam R, Worobey M, Sterling C. 2007. Population genetics provides evidence for recombination in *Giardia*. *Current*  
530 *Biology* 17: 1984-1988.



531 Corradi N, Lildhar L. 2012. Meiotic genes in the arbuscular mycorrhizal fungi: What for? *Communicative & Integrative Biology* 5:  
532 187-189.

533 Crane E. 1997. A revised circumscription of the genera of the fern family Vittariaceae. *Systematic Botany* 22: 509-517.

534 Crespi B, Sandoval C. 2000. Phylogenetic evidence for the evolution of ecological specialization in *Timema* walking-sticks. *Journal*  
535 *of Evolutionary Biology* 13: 249-262.

536 Crisp D, Standen A. 1988. *Lasaea rubra* (Montagu) (Bivalvia: Erycinacea), an apomictic crevice-living bivalve with clones separated  
537 by tidal level preference. *Journal of Experimental Marine Biology and Ecology* 117: 27-45.

538 Croll D, Sanders I. 2009. Recombination in *Glomus intraradices*, a supposed ancient asexual arbuscular mycorrhizal fungus. *Bmc*  
539 *Evolutionary Biology* 9.

540 Cuomo C, Desjardins C, Bakowski M, Goldberg J, Ma A, Becnel J, Didier E, Fan L, Heiman D, Levin J, Young S, Zeng Q, Troemel  
541 E. 2012. Microsporidian genome analysis reveals evolutionary strategies for obligate intracellular growth. *Genome Research*  
542 22: 2478-2488.

543 Dabert M, Witalinski W, Kazmierski A, Olszanowski Z, Dabert J. 2010. Molecular phylogeny of acariform mites (Acari, Arachnida):  
544 strong conflict between phylogenetic signal and long-branch attraction artifacts. *Molecular Phylogenetics and Evolution* 56:  
545 222-241.

546 Dacks J, Roger A. 1999. The first sexual lineage and the relevance of facultative sex. *Journal of Molecular Evolution* 48: 779-783.

547 Danovaro R, Dell'Anno A, Corinaldesi C, Magagnini M, Noble R, Tamburini C, Weinbauer M. 2008. Major viral impact on the  
548 functioning of benthic deep-sea ecosystems. *Nature* 454: 1084-1087.

549 Darby B, Neher D, Housman D, Belnap J. 2011. Few apparent short-term effects of elevated soil temperature and increased frequency  
550 of summer precipitation on the abundance and taxonomic diversity of desert soil micro- and meso-fauna. *Soil Biology &*  
551 *Biochemistry* 43: 1474-1481.

552 Dartnall H. 1983. Rotifers of the Antarctic and Subantarctic. *Hydrobiologia* 104: 57-60.

553 Dawkins R, Krebs JR. 1979. Arms races between and within species. *Proceedings of the Royal Society B-Biological Sciences* 205:  
554 489-511.

555 Debortoli N, Li X, Eyres I, Fontaneto D, Hespeels B, Tang CQ, Flot J, Van Doninck K. 2016. Genetic exchange among bdelloid  
556 rotifers is more likely due to horizontal gene transfer than to meiotic sex. *Current Biology* 26: 723-732.

557 de Castro F, Bolker B. 2005. Mechanisms of disease-induced extinction. *Ecology Letters* 8: 117-126.

558 Delmotte F, Leterme N, Bonhomme J, Rispe C, Simon JC. 2001. Multiple routes to asexuality in an aphid species. *Proceedings of the*  
559 *Royal Society B-Biological Sciences* 268: 2291-2299.

560 Delmotte F, Sabater-Muñoz B, Prunier-Leterme N, Latorre A, Sunnucks P, Rispe C, Simon JC. 2003. Phylogenetic evidence for  
561 hybrid origins of asexual lineages in an aphid species. *Evolution* 57: 1291-1303.

562 Delorme L, Donald D. 1969. Torpidity of freshwater ostracodes. *Canadian Journal of Zoology* 47: 997-999.

563 De Smet WH. 2002. Marine rotifera from the Crozet and Kerguelen Islands (Subantarctica), with the description of a new *Encentrum*  
564 (Monogononta: Dicranophoridae). *International Review of Hydrobiology* 87: 411-422.

565 Devetter M, Scholl K. 2014. Hydrobiont animals in floodplain soil: are they positively or negatively affected by flooding? *Soil*  
566 *Biology & Biochemistry* 69: 393-397.

567 Docking TR, Saade FE, Elliott MC, Schoen DJ. 2006. Retrotransposon sequence variation in four asexual plant species. *Journal of*  
568 *Molecular Evolution* 62: 375-387.

569 Doerder F. 2014. Abandoning sex: multiple origins of asexuality in the ciliate *Tetrahymena*. *Bmc Evolutionary Biology* 14.

570 Doherty K, Zweifel E, Elde N, McKone M, Zweifel S. 2003. Random amplified polymorphic DNA markers reveal genetic variation in  
571 the symbiotic fungus of leaf-cutting ants. *Mycologia* 95: 19-23.

572 Domes K, Althammer M, Norton RA, Scheu S, Maraun M. 2007a. The phylogenetic relationship between Astigmata and Oribatida  
573 (Acari) as indicated by molecular markers. *Experimental and Applied Acarology* 42: 159-171.

- 574 Domes K, Norton R, Maraun M, Scheu S. 2007b. Reevolution of sexuality breaks Dollo's law. *Proceedings of the National Academy*  
575 *of Sciences of the United States of America* 104: 7139-7144.
- 576 Domes K, Scheu S, Maraun M. 2007c. Resources and sex: soil re-colonization by sexual and parthenogenetic oribatid mites.  
577 *Pedobiologia* 51: 1-11.
- 578 Donner J. 1975. Randbiotopie von Fliessgewässern als Orte der Anpassung von Wasserorganismen an Bodenbedingungen, gezeigt an  
579 Rotatorien der Donau und Nebenflüsse. In: Müller P, ed. *Verhandlungen der Gesellschaft für Ökologie Wien 1975*. Dordrecht:  
580 Springer Science+Business Media B.V., 231-234.
- 581
- 582 Drake LA, Choi KH, Haskell AE, Dobbs FC. 1998. Vertical profiles of virus-like particles and bacteria in the water column and  
583 sediments of Chesapeake Bay, USA. *Aquatic Microbial Ecology* 16: 17-25.
- 584 Drmota T, Kral J. 1997. Karyotype of *Trichomonas vaginalis*. *European Journal of Protistology* 33: 131-135.
- 585 Ebihara A, Farrar D, Ito M. 2008. The sporophyte-less filmy fern of eastern North America *Trichomanes intricatum*  
586 (Hymenophyllaceae) has the chloroplast genome of an Asian species. *American Journal of Botany* 95: 1645-1651.
- 587 Ebihara A, Matsumoto S, Ito M. 2009. Hybridization involving independent gametophytes in the *Vandenboschia radicans* complex  
588 (Hymenophyllaceae): a new perspective on the distribution of fern hybrids. *Molecular Ecology* 18: 4904-4911.
- 589 Edgecombe GD, Giribet G, Dunn CW, Hejnol A, Kristensen RM, Neves RC, Rouse GW, Worsaae K, Sørensen MV. 2011. Higher-  
590 level metazoan relationships: recent progress and remaining questions. *Organisms Diversity & Evolution* 11: 151-172.
- 591 Elliott ET, Anderson RV, Coleman DC, Cole CV. 1980. Habitable pore space and microbial trophic interactions. *Oikos* 35: 327-335.
- 592 El-Sayed N, Myler P, Bartholomeu D, Nilsson D, Aggarwal G, Tran A, Ghedin E, Worthey E, Delcher A, Blandin G, Westenberger S,  
593 Caler E, Cerqueira G, Branche C, Haas B, Anupama A, Arner E, Aslund L, Attipoe P, Bontempi E, Bringaud F, Burton P,  
594 Cadag E, Campbell D, Carrington M, Crabtree J, Darban H, da Silveira J, de Jong P, Edwards K, Englund P, Fazelina G,  
595 Feldblyum T, Ferella M, Frasc A, Gull K, Horn D, Hou L, Huang Y, Kindlund E, Ktingbeil M, Kluge S, Koo H, Lacerda D,

596 Levin M, Lorenzi H, Louie T, Machado C, McCulloch R, McKenna A, Mizuno Y, Mottram J, Nelson S, Ochaya S, Osoegawa  
597 K, Pai G, Parsons M, Pentony M, Pettersson U, Pop M, Ramirez J, Rinta J, Robertson L, Salzberg S, Sanchez D, Seyler A,  
598 Sharma R, Shetty J, Simpson A, Sisk E, Tammi M, Tarteton R, Teixeira S, Van Aken S, Vogt C, Ward P, Wickstead B,  
599 Wortman J, White O, Fraser C, Stuart K, Andersson B. 2005. The genome sequence of *Trypanosoma cruzi*, etiologic agent of  
600 Chagas disease. *Science* 309: 409-415.

601 Elzinga J, Jokela J, Shama L. 2013. Large variation in mitochondrial DNA of sexual and parthenogenetic *Dahlica triquetrella*  
602 (Lepidoptera: Psychidae) shows multiple origins of parthenogenesis. *Bmc Evolutionary Biology* 13.

603 Emiliani C. 1982. Extinctive evolution: extinctive and competitive evolution combine into a unified model of evolution. *Journal of*  
604 *Teoretical Biology* 97: 13-33.

605 Emiliani C. 1993a. Extinction and viruses. *Biosystems* 31: 155-159.

606 Emiliani C. 1993b. Viral extinctions in deep-sea species. *Nature* 366: 217-218.

607 Etter RJ, Rex MA, Chase MR, Quattro JM. 2005. Population differentiation decreases with depth in deep-sea bivalves. *Evolution* 59:  
608 1479-1491.

609 Farrar D. 1967. Gematophytes of four tropical fern genera reproducing independently of their sporophytes in the southern  
610 Appalachians. *Science* 155: 1266-1267.

611 Farrar D. 1974. Gemmiferous fern gametophytes—Vittariaceae. *American Journal of Botany* 61: 146-155.

612 Farrar D. 1978. Problems in the identity and origin of the Appalachian *Vittaria* gametophyte, a sporophyteless fern of the eastern  
613 United States. *American Journal of Botany* 65: 1-12.

614 Farrar D. 1985. Independent fern gametophytes in the wild. *Proceedings of the Royal Society of Edinburgh Section B-Biological*  
615 *Sciences* 86: 361-369.

616 Farrar D. 1990. Species and evolution in asexually reproducing independent fern gametophytes. *Systematic Botany* 15: 98-111.

617 Farrar D. 1992. *Trichomanes intricatum*: the independent *Trichomanes* gametophyte in the eastern United States. *American Fern*  
618 *Journal* 82: 68-74.

619 Farrar D. 1998. The tropical flora of rockhouse cliff formations in the eastern United States. *Journal of the Torrey Botanical Society*  
620 125: 91-108.

621 Farrar D, Mickel J. 1991. *Vittaria appalachiana*: a name for the "Appalachian gametophyte". *American Fern Journal* 81: 69-75.

622 Farrell BD, Sequeira AS, O'Meara BC, Normark B, Chung JH, Jordal BH. 2001. The evolution of agriculture in beetles  
623 (Curculionidae: Scolytinae and Platypodinae). *Evolution* 55: 2011-2027.

624 Filippini M, Buesing N, Bettarel Y, Sime-Ngando T, Gessner MO. 2006. Infection paradox: high abundance but low impact of  
625 freshwater benthic viruses. *Applied and Environmental Microbiology* 72: 4893-4898.

626 Fisher UR, Wieltschnig C, Kirschner AKT, Velimirov B. 2003. Does virus-induced lysis contribute significantly to bacterial mortality  
627 in the oxygenated sediment layer of shallow oxbow lakes? *Applied and Environmental Microbiology* 69: 5281-5289.

628 Flot J, Debortoli N, Hallet B, Van Doninck K. 2016. Response to Signorovitch *et al.* *Current Biology* 26: R755.

629 Flot J, Hespels B, Li X, Noel B, Arkhipova I, Danchin E, Hejnol A, Henrissat B, Koszul R, Aury J, Barbe V, Barthelemy R, Bast J,  
630 Bazykin G, Chabrol O, Couloux A, Da Rocha M, Da Silva C, Gladyshev E, Gouret P, Hallatschek O, Hecox-Lea B, Labadie  
631 K, Lejeune B, Piskurek O, Poulain J, Rodriguez F, Ryan J, Vakhrusheva O, Wajnberg E, Wirth B, Yushenova I, Kellis M,  
632 Kondrashov A, Welch D, Pontarotti P, Weissenbach J, Wincker P, Jaillon O, Van Doninck K. 2013. Genomic evidence for  
633 ameiotic evolution in the bdelloid rotifer *Adineta vaga*. *Nature* 500: 453-457.

634 Fontaneto D, Jondelius U. 2011. Broad taxonomic sampling of mitochondrial cytochrome c oxidase subunit I does not solve the  
635 relationships between Rotifera and Acanthocephala. *Zoologischer Anzeiger* 250: 80-85.

636 Forche A, Alby K, Schaefer D, Johnson A, Berman J, Bennett R. 2008. The parasexual cycle in *Candida albicans* provides an  
637 alternative pathway to meiosis for the formation of recombinant strains. *Plos Biology* 6: 1084-1097.

638 Frisch D, Green A, Figuerola J. 2007. High dispersal capacity of a broad spectrum of aquatic invertebrates via waterbirds. *Aquatic*  
639 *Sciences* 69: 568-574.

640 Fritz-Laylin L, Prochnik S, Ginger M, Dacks J, Carpenter M, Field M, Kuo A, Paredez A, Chapman J, Pham J, Shu S, Neupane R,  
641 Cipriano M, Mancuso J, Tu H, Salamov A, Lindquist E, Shapiro H, Lucas S, Grigoriev I, Cande W, Fulton C, Rokhsar D,  
642 Dawson S. 2010. The Genome of *Naegleria gruberi* Illuminates Early Eukaryotic Versatility. *Cell* 140: 631-642.

643 Fucikova K, Pazoulova M, Rindi F. 2015. Meiotic genes and sexual reproduction in the green algal class Trebouxiophyceae  
644 (chlorophyta). *Journal of Phycology* 51: 419-430.

645 Fuhrman JA. 1999. Marine viruses and their biogeochemical and ecological effects. *Nature* 399: 541-548

646 Gandolfi A, Bonilauri P, Rossi V, Menozzi P. 2001. Intraindividual and intraspecies variability of ITS1 sequences in the ancient  
647 asexual *Darwinula stevensoni* (Crustacea: Ostracoda). *Heredity* 87: 449-455.

648 Gandolfi A, Sanders I, Rossi V, Menozzi P. 2003. Evidence of recombination in putative ancient asexuals. *Molecular Biology and*  
649 *Evolution* 20: 754-761.

650 Garcia-Varela M, Nadler SA. 2006. Phylogenetic relationships among Syndermata inferred from nuclear and mitochondrial gene  
651 sequences. *Molecular Phylogenetics and Evolution* 40: 61-72.

652 Garey J, Near T, Nonnemacher M, Nadler S. 1996. Molecular evidence for Acanthocephala as a subtaxon of Rotifera. *Journal of*  
653 *Molecular Evolution* 43: 287-292.

654 Gastony G. 1977. Chromosomes of the independently reproducing Appalachian gametophyte: a new source of taxonomic evidence.  
655 *Systematic Botany* 2: 43-48.

656 Gaunt M, Yeo M, Frame I, Stothard J, Carrasco H, Taylor M, Mena S, Veazey P, Miles G, Acosta N, de Arias A, Miles M. 2003.  
657 Mechanism of genetic exchange in American trypanosomes. *Nature* 421: 936-939.

658 Giovannetti M, Sbrana C, Strani P, Agnolucci M, Rinaudo V, Avio L. 2003. Genetic diversity of isolates of *Glomus mosseae* from  
659 different geographic areas detected by vegetative compatibility testing and biochemical and molecular analysis. *Applied and*  
660 *Environmental Microbiology* 69: 616-624.

661 Gladyshev E, Arkhipova I. 2007. Telomere-associated endonuclease-deficient Penelope-like retroelements in diverse eukaryotes.  
662 *Proceedings of the National Academy of Sciences of the United States of America* 104: 9352-9357.

663 Gladyshev E, Meselson M. 2008. Extreme resistance of bdelloid rotifers to ionizing radiation. *Proceedings of the National Academy of*  
664 *Sciences of the United States of America* 105: 5139-5144.

665 Gladyshev E, Meselson M, Arkhipova I. 2007. A deep-branching clade of retrovirus-like transposons in bdelloid rotifers. *Gene* 390:  
666 136-149.

667 Gladyshev E, Meselson M, Arkhipova I. 2008. Massive horizontal gene transfer in bdelloid rotifers. *Science* 320: 1210-1213.

668 Glöckner G, Hulsmann N, Schleicher M, Noegel A, Eichinger L, Gallinger C, Pawlowski J, Sierra R, Euteneuer U, Pillet L, Moustafa  
669 A, Platzer M, Groth M, Szafranski K, Schliwa M. 2014. The Genome of the Foraminiferan *Reticulomyxa filosa*. *Current*  
670 *Biology* 24: 11-18.

671 Gomez-Zurita J, Funk D, Vogler A. 2006. The evolution of unisexuality in *Calligrapha* leaf beetles: molecular and ecological insights  
672 on multiple origins via interspecific hybridization. *Evolution* 60: 328-347.

673 Goodwin T, Poulter R. 2000. Multiple LTR-retrotransposon families in the asexual yeast *Candida albicans*. *Genome Research* 10:  
674 174-191.

675 Grapputo A, Kumpulainen T, Mappes J. 2005. Phylogeny and evolution of parthenogenesis in Finnish bagworm moth species  
676 (Lepidoptera: Psychidae: Naryciinae) based on mtDNA-markers. *Annales Zoologici Fennici* 42: 141-160.

677 Graser Y, Volovsek M, Arrington J, Schonian G, Presber W, Mitchell T, Vilgalys R. 1996. Molecular markers reveal that population  
678 structure of the human pathogen *Candida albicans* exhibits both clonality and recombination. *Proceedings of the National*  
679 *Academy of Sciences of the United States of America* 93: 12473-12477.

- 680 Grigg M, Bonnefoy S, Hehl A, Suzuki Y, Boothroyd J. 2001. Success and virulence in *Toxoplasma* as the result of sexual  
681 recombination between two distinct ancestries. *Science* 294: 161-165.
- 682 Grimsley N, Pequin B, Bachy C, Moreau H, Piganeau G. 2010. Cryptic sex in the smallest eukaryotic marine green alga. *Molecular*  
683 *Biology and Evolution* 27: 47-54.
- 684 Gwiazdowicz D, Klemt J. 2004. Mesostigmatic mites (Acari, Gamasida) in selected microhabitats of the Biebrza National Park (NE  
685 Poland). *Biological Letters* 41.
- 686 Haag K, Sheikh-Jabbari E, Ben-Ami F, Ebert D. 2013. Microsatellite and single-nucleotide polymorphisms indicate recurrent  
687 transitions to asexuality in a microsporidian parasite. *Journal of Evolutionary Biology* 26: 1117-1128.
- 688 Halary S, Malik S-B, Lildhar L, Slamovits C, Hijri M, Corradi N. 2011. Conserved meiotic machinery in *Glomus* spp., a putatively  
689 ancient asexual fungal lineage. *Genome Biology and Evolution* 3: 950-958.
- 690 Halkett F, Plantegenest M, Prunier-Leterme N, Mieuze L, Delmotte F, Simon J. 2005. Admixed sexual and facultatively asexual  
691 aphid lineages at mating sites. *Molecular Ecology* 14: 325-336.
- 692 Hammer M, Wallwork J. 1979. A review of the world distribution of oribatid mites (Acari: Cryptostigmata) in relation to continental  
693 drift. *Biologiske Skrifter Kongelige Danske Videnskabernes Selskab* 22: 5-31.
- 694 Hampl V, Pavlicek A, Flegr J. 2001. Construction and bootstrap analysis of DNA fingerprinting-based phylogenetic trees with the  
695 freeware program FreeTree: application to trichomonad parasites. *International Journal of Systematic and Evolutionary*  
696 *Microbiology* 51: 731-735.
- 697 Havill N, Footitt R, von Dohlen C. 2007. Evolution of host specialization in the Adelgidae (Insecta: Hemiptera) inferred from  
698 molecular phylogenetics. *Molecular Phylogenetics and Evolution* 44: 357-370.
- 699 Hebert P, Remigio E, Colbourne J, Taylor D, Wilson C. 2002. Accelerated molecular evolution in halophilic crustaceans. *Evolution*  
700 56: 909-926.
- 701 Hedges SB, Bogart JP, Maxson LR. 1992. Ancestry of unisexual salamanders. *Nature* 356: 708-710.



- 702 Heethoff M. 2004. Genetic diversity and evolutionary age of parthenogenetic oribatid mites (Acari: Oribatida). Unpublished D. Phil.  
703 Thesis, Technischen Universität Darmstadt.
- 704 Heethoff M, Domes K, Laumann M, Maraun M, Norton RA, Scheu S. 2007. High genetic divergences indicate ancient separation of  
705 parthenogenetic lineages of the oribatid mite *Platynothrus peltifer* (Acari, Oribatida). *Journal of Evolutionary Biology* 20: 392-  
706 402.
- 707 Heethoff M, Norton R, Scheu S, Maraun M. 2009. Parthenogenesis in oribatid mites (Acari, Oribatida): evolution without sex. In:  
708 Schön I, Martens K, van Dijk P, eds. *Lost Sex: The Evolutionary Biology of Parthenogenesis*. Dordrecht: Springer  
709 Science+Business Media B.V., 241-257.
- 710 Heitman J. 2006. Sexual reproduction and the evolution of microbial pathogens. *Current Biology* 16: R711-R725.
- 711 Heller J, Farstey V. 1990. Sexual and parthenogenetic populations of the freshwater snail *Melanoides tuberculata* in Israel. *Israel*  
712 *Journal of Ecology* 37: 75-87.
- 713 Henry L, Schwander T, Crespi B. 2012. Deleterious mutation accumulation in asexual *Timema* stick insects. *Molecular Biology and*  
714 *Evolution* 29: 401-408.
- 715 Herlyn H, Piskurek O, Schmitz J, Ehlers U, Zischler H. 2003. The syndermatan phylogeny and the evolution of acanthocephalan  
716 endoparasitism as inferred from 18S rDNA sequences. *Molecular Phylogenetics and Evolution* 26: 155-164.
- 717 Hill D, Wetherbee R. 1986. *Proteomonas sulcata* gen. et sp. nov. (Cryptophyceae), a cryptomonad with two morphologically distinct  
718 and alternating forms. *Phycologia* 25: 521-543.
- 719 Hinkle G, Wetterer J, Schultz T, Sogin M. 1994. Phylogeny of the attine ant fungi based on analysis of small subunit ribosomal RNA  
720 gene sequences. *Science* 266: 1695-1697.
- 721 Horne D, Baltanás A, Paris G. 1998. Geographical distribution of reproductive modes. In: Martens K, ed. *Sex and Parthenogenesis:*  
722 *Evolutionary Ecology of Reproductive Modes in Non-Marine Ostracds*. Leiden: Backhuys. 77-99.
- 723 Horne F. 1993. Survival strategy to escape desiccation in a freshwater ostracod. *Crustaceana* 65: 53-61.

- 724 Howe D, Sibley L. 1995. *Toxoplasma gondii* comprises three clonal lineages: correlation of parasite genotype with human disease.  
725 *Journal of Infectious Diseases* 172: 1561-1566.
- 726 Hörandl E. 2006. The complex causality of geographical parthenogenesis. *New Phytologist* 171: 525-538.
- 727 Hörandl E. 2009. Geographical parthenogenesis: opportunities for asexuality. In: Schön I, Martens K, van Dijk P, eds. *Lost Sex: The*  
728 *Evolutionary Biology of Parthenogenesis*. Dordrecht: Springer Science+Business Media B.V., 161-186.
- 729 Hsu W. 1956a. Oogenesis in *Habrotrocha tridens* (Milne). *Biological bulletin* 111: 364-374.
- 730 Hsu W. 1956b. Oogenesis in the Bdelloidea rotifer *Philodina roseola* Ehrenberg. *Cellule* 57: 283-296.
- 731 Hull C, Johnson A. 1999. Identification of a mating type-like locus in the asexual pathogenic yeast *Candida albicans*. *Science* 285:  
732 1271-1275.
- 733 Hur JH, Van Doninck K, Mandigo ML, Meselson M. 2009. Degenerate tetraploidy was established before bdelloid rotifer families  
734 diverged. *Molecular Biology and Evolution* 26: 375-383.
- 735 Ironside J. 2007. Multiple losses of sex within a single genus of microsporidia. *Bmc Evolutionary Biology* 7.
- 736 Issel R. 1900. Saggio sulla fauna termale italiana, Nota I. *Atti della Reale Accademia delle scienze di Torino* 36: 53-73.
- 737 Issel R. 1901. Saggio sulla fauna termale italiana, Nota II. *Atti della Reale Accademia delle scienze di Torino* 36: 265-277.
- 738 Jana B, Sarkar H. 1971. The limnology of “Swetganga”—A thermal spring of Bakreswar, West Bengal, India. *Hydrobiologia* 37: 33-  
739 47.
- 740 Janiec K. 1996. The comparison of freshwater invertebrates of Spitsbergen (Arctic) and King George Island (Antarctic). *Polish Polar*  
741 *Research* 17: 173-202.
- 742 Johnson S. 2006. Geographic ranges, population structure, and ages of sexual and parthenogenetic snail lineages. *Evolution* 60: 1417-  
743 1426.
- 744 Johnson S, Bragg E. 1999. Age and polyphyletic origins of hybrid and spontaneous parthenogenetic *Campeloma* (Gastropoda:  
745 Viviparidae) from the southeastern United States. *Evolution* 53: 1769-1781.

- 746 Jorgensen A, Mobjerg N, Kristensen R. 2007. Molecular study of the tardigrade *Echiniscus testudo* (Echiniscidae) reveals low DNA  
747 sequence diversity over a large geographical area. *Journal of Limnology* 66: 77-83.
- 748 Judson OP, Normark B. 1996. Ancient asexual scandals. *Trends in Ecology & Evolution* 11: A41-A46.
- 749 Jungblut AD, Vincent WF, Lovejoy C. 2012. Eukaryotes in Arctic and Antarctic cyanobacterial mats. *Fems Microbiology Ecology* 82:  
750 416-428.
- 751 Karasawa S, Hijii N. 2008. Vertical stratification of oribatid (Acari: Oribatida) communities in relation to their morphological and  
752 life-history traits and tree structures in a subtropical forest in Japan. *Ecological Research* 23: 57-69.
- 753 Kessenich C, Ruck E, Schurko A, Wickett N, Alverson A. 2014. Transcriptomic insights into the life history of Bolidophytes, the  
754 sister lineage to diatoms. *Journal of Phycology* 50: 977-983.
- 755 Kethley J. 1989. Occurrence of *Pomerantzia kethleyi* (Acari: Prostigmata: Pomerantziidae) in Illinois and Minnesota. *Great Lakes*  
756 *Entomologist* 22: 101-101.
- 757 Khan A, Fux B, Su C, Dubey J, Darde M, Ajioka J, Rosenthal B, Sibley L. 2007. Recent transcontinental sweeps of *Toxoplasma*  
758 *gondii* driven by a single monomorphic chromosome. *Proceedings of the National Academy of Sciences of the United States of*  
759 *America* 104: 14872-14877.
- 760 Klie V. 1939. Zur Kenntnis von *Cypris balnearia* Moniez (Ostracoda). *Zoologische Anzeiger* 126: 298-302.
- 761 Koste W, Shiel RJ. 1986. Rotifera from Australian inland waters. I. Bdelloidea (Rotifera: Digononta). *Australian Journal of Marine*  
762 *and Freshwater Research* 37: 765-792.
- 763 Krivolutsky D, Druk A. 1986. Fossil oribatid mites. *Annual Review of Entomology* 31: 533-545.
- 764 Kugrens P, Lee R. 1988. Ultrastructure of fertilization in a cryptomonad. *Journal of Phycology* 24: 385-393.
- 765 Kùlköylüođlu O, Meisch C, Rust R. 2003. *Thermopsis thermophila* n. gen. n. sp. from hot springs in Nevada, USA (Crustacea,  
766 Ostracoda). *Hydrobiologia* 499: 113-123.

- 767 Klkylođlu O, Vinyard G. 2000. Distribution and ecology of freshwater Ostracoda (Crustacea) collected from springs of Nevada,  
768 Idaho, and Oregon: A preliminary study. *Western North American Naturalist* 60: 291-303.
- 769 Lanteri A, Marvaldi A. 1995. *Graphognathus* Buchanan a new synonym of *Naupactus* Dejean and systematics of the *N. Leucoloma*  
770 species group (Coleoptera: Curculionidae). *The Coleopterists Bulletin* 49: 206-228.
- 771 Lasek-Nesselquist E. 2012. A mitogenomic re-evaluation of the bdelloid phylogeny and relationships among the Syndermata. *Plos*  
772 *One* 7.
- 773 Laumann M, Bergmann P, Heethoff M. 2008. Some remarks on the cytogenetics of oribatid mites. *Soil Organisms* 80: 223-232.
- 774 Laumann M, Norton R, Weigmann G, Scheu S, Maraun M, Heethoff M. 2007. Speciation in the parthenogenetic oribatid mite genus  
775 *Tectocephus* (Acari, Oribatida) as indicated by molecular phylogeny. *Pedobiologia* 51: 111-122.
- 776 Lavelle P, Spain AV. 2003. *Soil Ecology*. New York, USA: Kluwer Academic Publishers.
- 777 Law J, Crespi B. 2002a. Recent and ancient asexuality in *Timema* walkingsticks. *Evolution* 56: 1711-1717.
- 778 Law J, Crespi B. 2002b. The evolution of geographic parthenogenesis in *Timema* walking-sticks. *Molecular Ecology* 11: 1471-1489.
- 779 Levin T, King N. 2013. Evidence for Sex and Recombination in the Choanoflagellate *Salpingoeca rosetta*. *Current Biology* 23: 2176-  
780 2180.
- 781 Liebau A. 2005. A revised classification of the higher taxa of the Ostracoda (Crustacea). *Hydrobiologia* 538: 115-137.
- 782 Li J, Ó Foighil D, Park J. 2013. Triton's trident: cryptic Neogene divergences in a marine clam (*Lasaea australis*) correspond to  
783 Australia's three temperate biogeographic provinces. *Molecular Ecology* 22: 1933-1946.
- 784 Lunt D. 2008. Genetic tests of ancient asexuality in root knot nematodes reveal recent hybrid origins. *Bmc Evolutionary Biology* 8.
- 785 McLay C. 1978. Comparative observations on the ecology of four species of ostracods living in a temporary freshwater puddle.  
786 *Canadian Journal of Zoology* 56: 663-375.

787 MacLeod A, Tweedie A, McLellan S, Taylor S, Cooper A, Sweeney L, Turner C, Tait A. 2005. Allelic segregation and independent  
788 assortment in *T. brucei* crosses: Proof that the genetic system is Mendelian and involves meiosis. *Molecular and Biochemical*  
789 *Parasitology* 143: 12-19.

790 Maddocks R. 1976. Quest for the ancestral podocopid: numerical cladistic analysis of ostracode appendages, a preliminary report.  
791 *Abhandlungen und Verhandlungen des Naturwissenschaftlichen Vereins in Hamburg* 18: 39-53.

792 Malik S, Pightling A, Stefaniak L, Schurko A, Logsdon J. 2008. An Expanded Inventory of Conserved Meiotic Genes Provides  
793 Evidence for Sex in *Trichomonas vaginalis*. *Plos One* 3.

794 Malmqvist B, Meisch C, Nilsson A. 1997. Distribution patterns of freshwater Ostracoda (Crustacea) in the Canary Islands with  
795 regards to habitat use and biogeography. *Hydrobiologia* 347: 159-170.

796 Mantovani B, Passamonti M, Scali V. 2001. The mitochondrial cytochrome oxidase II gene in *Bacillus* stick insects: ancestry of  
797 hybrids, androgenesis, and phylogenetic relationships. *Molecular Phylogenetics and Evolution* 19: 157-163.

798 Maraun M, Erdmann G, Schulz G, Norton RA, Scheu S, Domes K. 2009. Multiple convergent evolution of arboreal life in oribatid  
799 mites indicates the primacy of ecology. *Proceedings of the Royal Society B-Biological Sciences* 276: 3219-3227.

800 Maraun M, Heethoff M, Scheu S, Norton RA, Weigmann G, Thomas RH. 2003. Radiation in sexual and parthenogenetic oribatid  
801 mites (Oribatida, Acari) as indicated by genetic divergence of closely related species. *Experimental and Applied Acarology* 29:  
802 265-277.

803 Maraun M, Heethoff M, Schneider K, Scheu S, Weigmann G, Cianciolo J, Thomas RH, Norton RA. 2004. Molecular phylogeny of  
804 oribatid mites (Oribatida, Acari): evidence for multiple radiations of parthenogenetic lineages. *Experimental and Applied*  
805 *Acarology* 33: 183-201.

806 Maraun M, Norton RA, Ehnes RB, Scheu S, Erdmann G. 2012. Positive correlation between density and parthenogenetic reproduction  
807 in oribatid mites (Acari) supports the structured resource theory of sexual reproduction. *Evolutionary Ecology Research* 14:  
808 311-323.

- 809 Marshall W, Berbee M. 2010. Population-level analyses indirectly reveal cryptic sex and life history traits of *Pseudoperkinsus tapetis*  
810 (Ichthyosporea, Opisthokonta): a unicellular relative of the animals. *Molecular Biology and Evolution* 27: 2014-2026.
- 811 Martens K. 1998. Sex and ostracods: a new synthesis. In: Martens K, ed. *Sex and Parthenogenesis: Evolutionary Ecology of*  
812 *Reproductive Modes in Non-Marine Ostracds*. Leiden: Backhuys, 295-321.
- 813 Martens K, Horne D, Griffiths H. 1998a. Age and diversity of non-marine ostracods. In: Martens K, ed. *Sex and Parthenogenesis:*  
814 *Evolutionary Ecology of Reproductive Modes in Non-Marine Ostracds*. Leiden: Backhuys, 37-55.
- 815 Martens K, Rossetti G, Baltanás A. 1998b. Reproductive modes and taxonomy. In: Martens K, ed. *Sex and Parthenogenesis:*  
816 *Evolutionary Ecology of Reproductive Modes in Non-Marine Ostracds*. Leiden: Backhuys, 197-214.
- 817 Martens K, Rossetti G, Butlin R, Schön I. 2005. Molecular and morphological phylogeny of the ancient asexual Darwinulidae  
818 (Crustacea, Ostracoda). *Hydrobiologia* 538: 153-165.
- 819 Martens K, Rossetti G, Fuhrmann R. 1997. Pleistocene and recent species of the family Darwinulidae Brady & Norman, 1889  
820 (Crustacea, Ostracoda) in Europe. *Hydrobiologia* 357: 99-116.
- 821 Martens K, Rossetti G, Horne D. 2003. How ancient are ancient asexuals? *Proceedings of the Royal Society B-Biological Sciences*  
822 270: 723-729.
- 823 Martens K, Savatnalinton S. 2011. A subjective checklist of the recent, free-living, non-marine Ostracoda (Crustacea). *Zootaxa*: 1-79.
- 824 Martens K, Schön I. 2000. The importance of habitat stability for the prevalence of sexual reproduction. In: Minoura K, ed. *Lake*  
825 *Baikal: a Mirror in Time and Space for Understanding Global Change Processes. Yokohama Symposium 1998*. Amsterdam:  
826 Elsevier, 324-330.
- 827 Martens K, Schön I, Meisch C, Horne D. 2008. Global diversity of ostracods (Ostracoda, Crustacea) in freshwater. *Hydrobiologia*  
828 595: 185-193.
- 829 Mateos M, Vrijenhoek RC. 2002. Ancient versus reticulate origin of a hemiclinal lineage. *Evolution* 56: 985-992.
- 830 Maynard Smith J. 1986. Evolution: contemplating life without sex. *Nature* 324: 300-301.

- 831 Mayr E. 1963. *Animal species and Evolution*. Harvard University Press: Cambridge.
- 832 McDermott T, Skorupa D. 2011. *Microbiology of Serpentine Hot Springs, Alaska*. Montana State University: Bozeman.
- 833 McGrath D, Ó Foighil D. 1986. Population dynamics and reproduction of hermaphroditic *Lasaea rubra* (Montagu) (Bivalvia,  
834 Galeommatacea). *Ophelia* 25: 209-219.
- 835 McLay C. 1978. Comparative observations on the ecology of four species of ostracods living in a temporary freshwater puddle.  
836 *Canadian Journal of Zoology* 56: 663-375.
- 837 Melone G, Ricci C. 1995. Rotatory apparatus in Bdelloids. *Hydrobiologia* 313: 91-98.
- 838 Menzel R. 1923. Beitrage zur kenntnis der Mikrofauna von Niederandisch-Ostidien V. Moosbewohnende Ostracoden aus dem  
839 Urwald von Tjibodas. *Treubia* 3: 193-196.
- 840 Mikheyev AS, Mueller UG, Abbot P. 2006. Cryptic sex and many-to-one coevolution in the fungus-growing ant symbiosis.  
841 *Proceedings of the National Academy of Sciences of the United States of America* 103: 10702-10706.
- 842 Miller W, Claxton S, Heatwole H. 1999. Tardigrades of the Australian Antarctic territories: Males in the genus *Echiniscus*  
843 (Tardigrada: Heterotardigrada). *Zoologischer Anzeiger* 238: 303-309.
- 844 Min GS, Park JK. 2009. Eurotatorian paraphyly: revisiting phylogenetic relationships based on the complete mitochondrial genome  
845 sequence of *Rotaria rotatoria* (Bdelloidea: Rotifera: Syndermata). *Bmc Genomics* 10.
- 846 Molostovskaya I. 2000. The evolutionary history of Late Permian Darwinulocopina Sohn, 1988 (Ostracoda) from the Russian Plate.  
847 *Hydrobiologia* 419: 125-130.
- 848 Moniez R. 1893. Description d'une nouvelle espèce de Cypris vivant dans les eaux thermales du Hammam-Meskhoutine. *Bulletin de*  
849 *la Société zoologique de France* 18: 140-142.
- 850 Montelongo T, Gomez-Zurita J. 2015. Nonrandom Patterns of Genetic Admixture Expose the Complex Historical Hybrid Origin of  
851 Unisexual Leaf Beetle Species in the Genus *Calligrapha*. *American Naturalist* 185: 113-134.
- 852 Moran N. 1992. The evolution of aphid life cycles. *Annual Review of Entomology* 37: 321-348.

853 Morris D. 2012. A new model for myxosporean (Myxozoa) development explains the endogenous budding phenomenon, the nature of  
854 cell within cell life stages and evolution of parasitism from a cnidarian ancestor. *International Journal For Parasitology* 42:  
855 829-840.

856 Morrison H, McArthur A, Gillin F, Aley S, Adam R, Olsen G, Best A, Cande W, Chen F, Cipriano M, Davids B, Dawson S,  
857 Elmendorf H, Hehl A, Holder M, Huse S, Kim U, Lasek-Nesselquist E, Manning G, Nigam A, Nixon J, Palm D, Passamaneck  
858 N, Prabhu A, Reich C, Reiner D, Samuelson J, Svard S, Sogin M. 2007. Genomic minimalism in the early diverging intestinal  
859 parasite *Giardia lamblia*. *Science* 317: 1921-1926.

860 Morrison J. 1954. The relationships of old and new world melanians. *Proceedings of the United States National Museum* 103: 357-  
861 394.

862 Morton JE, Boney AD, Corner EDS. 1957. The adaptations of *Lasaea rubra* (Montagu), a small intertidal lamellibranch. *Journal of*  
863 *the Marine Biological Association of the United Kingdom* 36: 383-405.

864 Mueller U. 2002. Ant versus fungus versus mutualism: ant–cultivar conflict and the deconstruction of the attine ant–fungus symbiosis.  
865 *American Naturalist* 160: S67-S98.

866 Mueller U, Gerardo N, Aanen D, Six D, Schultz T. 2005. The evolution of agriculture in insects. *Annual Review of Ecology Evolution*  
867 *and Systematics* 36: 563-595.

868 Mueller U, Rehner SA, Schultz TR. 1998. The evolution of agriculture in ants. *Science* 281: 2034-2038.

869 Muñoz J, Gómez A, Green A, Figuerola J, Amat F, Rico C. 2010. Evolutionary origin and phylogeography of the diploid obligate  
870 parthenogen *Artemia parthenogenetica* (Branchiopoda: Anostraca). *Plos One* 5.

871 Murphy SL, Tate RL. 1996. Bacterial movement through soil. In: Stozsky G & Bollag JM, ed. *Soil Biochemistry Vol. 9*. New York:  
872 Marcel Dekker, 253-286.

873 Nascetti G, Bondanelli P, Aldinucci A, Cimmaruta R. 2003. Genetic structure of bisexual and parthenogenetic populations of *Artemia*  
874 from Italian brackish-hypersaline waters. *Oceanologica Acta* 26: 93-100.



- 875 Neher D, Lewins S, Weicht T, Darby B. 2009. Microarthropod communities associated with biological soil crusts in the Colorado  
876 Plateau and Chihuahuan deserts. *Journal of Arid Environments* 73: 672-677.
- 877 Neiman M, Jokela J, Lively C. 2005. Variation in asexual lineage age in *Potamopyrgus antipodarum*, a New Zealand snail. *Evolution*  
878 59: 1945-1952.
- 879 Neiman M, Larkin K, Thompson A, Wilton P. 2012. Male offspring production by asexual *Potamopyrgus antipodarum*, a New  
880 Zealand snail. *Heredity* 109: 57-62.
- 881 Neiman M, Lively C. 2004. Pleistocene glaciation is implicated in the phylogeographical structure of *Potamopyrgus antipodarum*, a  
882 New Zealand snail. *Molecular Ecology* 13: 3085-3098.
- 883 Neiman M, Lively C. 2005. Male New Zealand mud snails (*Potamopyrgus antipodarum*) persist in copulating with asexual and  
884 parasitically castrated females. *American Midland Naturalist* 154: 88-96.
- 885 Normark B. 1996. Phylogeny and evolution of parthenogenetic weevils of the *Aramigus tessellatus* species complex (Coleoptera:  
886 Curculionidae: Naupactini): Evidence from mitochondrial DNA sequences. *Evolution* 50: 734-745.
- 887 Normark B. 1999. Evolution in a putatively ancient asexual aphid lineage: recombination and rapid karyotype change. *Evolution* 53:  
888 1458-1469.
- 889 Normark B, Judson O, Moran N. 2003. Genomic signatures of ancient asexual lineages. *Biological Journal of the Linnean Society* 79:  
890 69-84.
- 891 Normark B, Lanteri A. 1998. Incongruence between morphological and mitochondrial-DNA characters suggests hybrid origins of  
892 parthenogenetic weevil lineages (genus *Aramigus*). *Systematic Biology* 47: 475-494.
- 893 Normark B, Moran NA. 2000. Opinion – Testing for the accumulation of deleterious mutations in asexual eukaryote genomes using  
894 molecular sequences. *Journal of Natural History* 34: 1719-1729.
- 895 Norton R. 1994. Evolutionary aspects of oribatid mite life histories and consequences for the origin of the Astigmata. In: Houck M,  
896 ed. *Mites. Ecological and Evolutionary Analyses of Life-History Patterns*. New York: Chapman & Hall, 99-135.

897 Norton R, Behan-Pelletier V. 2009. Suborder Oribatida. In: Krantz G, Walter D, eds. *A manual of acarology*. Lubbock: Texas Tech  
898 University Press, 430-564.

899 Norton R, Kethley J, Johnston D, O'Connor B. 1993. Phylogenetic perspectives on genetic systems and reproductive modes of mites.  
900 In: Wrensch D, Ebbert M, eds. *Evolution and diversity of sex ratio in insects and mites*. New York: Chapman and Hall, 8-99.

901 Norton R, Palmer S. 1991. The distribution, mechanisms and evolutionary significance of parthenogenesis in oribatid mites. In:  
902 Schuster R, Murphy P, eds. *The Acari: Reproduction, Development and Life-history Strategies*. London: Chapman and Hall,  
903 107-136.

904 Nowacki M, Shetty K, Landweber L, Chakravarti A, Green E. 2011. RNA-Mediated Epigenetic Programming of Genome  
905 Rearrangements. *Annual Review of Genomics and Human Genetics, Vol 12* 12: 367-389.

906 Nowacki M, Vijayan V, Zhou Y, Schotanus K, Doak T, Landweber L. 2008. RNA-mediated epigenetic programming of a genome-  
907 rearrangement pathway. *Nature* 451: 153-158.

908 Oconnor B. 2009. Cohort Astigmatina. In: Krantz G, Walter D, eds. *A manual of acarology*. Lubbock: Texas Tech University Press,  
909 565-657.

910 Odds F, Bougnoux M, Shaw D, Bain J, Davidson A, Diogo D, Jacobsen M, Lecomte M, Li S, Tavanti A, Maiden M, Gow N, d'Enfert  
911 C. 2007. Molecular phylogenetics of *Candida albicans*. *Eukaryotic Cell* 6: 1041-1052.

912 O'Gorman C, Fuller H, Dyer P. 2009. Discovery of a sexual cycle in the opportunistic fungal pathogen *Aspergillus fumigatus*. *Nature*  
913 457: 471-474.

914 Oliveira R, Broude N, Macedo A, Cantor C, Smith C, Pena S. 1998. Probing the genetic population structure of *Trypanosoma cruzi*  
915 with polymorphic microsatellites. *Proceedings of the National Academy of Sciences of the United States of America* 95: 3776-  
916 3780.

917 Ó Foighil D. 1985. Fine structure of *Lasaea subviridis* and *Mysella tumida* sperm (Bivalvia, Galeommatacea). *Zoomorphology* 105:  
918 125-132.

- 919 Ó Foighil D. 1987. Cytological evidence for self-fertilization in *Lasaea subviridis* (Galeommatacea: Bivalvia). *International Journal*  
920 *of Invertebrate Reproduction and Development* 12: 83-89.
- 921 Ó Foighil D. 1988. Random mating and planktotrophic larval development in the brooding hermaphroditic clam *Lasaea australis*  
922 (Lamarck, 1818). *Veliger* 31: 214-221.
- 923 Ó Foighil D. 1989. Planktotrophic larval development is associated with a restricted geographic range in *Lasaea*, a genus of brooding,  
924 hermaphroditic bivalves. *Marine Biology* 103: 349-358.
- 925 Ó Foighil D, Eernisse D. 1988. Geographically widespread, non-hybridizing, sympatric strains of the hermaphroditic, brooding clam  
926 *Lasaea* in the northeastern Pacific Ocean. *Biological Bulletin* 175: 218-229.
- 927 Ó Foighil D, Jozefowicz C. 1999. Amphi-Atlantic phylogeography of direct-developing lineages of *Lasaea*, a genus of brooding  
928 bivalves. *Marine Biology* 135: 115-122.
- 929 Ó Foighil D, Smith M. 1995. Evolution of asexuality in the cosmopolitan marine clam *Lasaea*. *Evolution* 49: 140-150.
- 930 Ó Foighil D, Smith M. 1996. Phylogeography of an asexual marine clam complex, *Lasaea*, in the northeastern Pacific based on  
931 cytochrome oxidase III sequence variation. *Molecular Phylogenetics and Evolution* 6: 134-142.
- 932 Ó Foighil D, Thiriot-Quévieux C. 1991. Ploidy and pronuclear interaction in northeastern Pacific *Lasaea* clones (Mollusca: Bivalvia).  
933 *Biological Bulletin* 181: 222-231.
- 934 Ó Foighil D, Thiriot-Quévieux C. 1999. Sympatric Australian *Lasaea* species (Mollusca: Bivalvia) differ in their ploidy levels,  
935 reproductive modes and developmental modes. *Zoological Journal of the Linnean Society* 127: 477-494.
- 936 Palmer S, Norton R. 1990. Further experimental proof of thelytokous parthenogenesis in oribatid mites (Acari: Oribatida:  
937 Desmonomata). *Experimental and Applied Acarology* 8: 149-159.
- 938 Palmer S, Norton R. 1991. Taxonomic, geographic and seasonal distribution of thelytokous parthenogenesis in the Desmonomata  
939 (Acari: Oribatida). *Experimental & Applied Acarology* 12: 67-81.

- 940 Palmer S, Norton R. 1992. Genetic diversity in thelytokous oribatid mites (Acari; Acariformes: Desmonomata). *Biochemical*  
941 *Systematics and Ecology* 20: 219-231.
- 942 Pan K, Qin J, Li S, Dai W, Zhu B, Jin Y, Yu W, Yang G, Li D. 2011. Nuclear monoploidy and asexual propagation of  
943 *Nannochloropsis oceanica* (eustigmatophyceae) as revealed by its genome sequence. *Journal of Phycology* 47: 1425-1432.
- 944 Parks J, Farrar D. 1984. A first report of the fern genus *Vittaria* in New York. *Rhodora* 86.
- 945 Paul EA. 2007. *Soil Microbiology, Ecology and Biochemistry*. USA: Academic Press.
- 946 Pax F, Wulfert K. 1941. Die Rädertiere der deutschen Thermen. *Lotos* 88: 246-262.
- 947 Peacock L, Bailey M, Carrington M, Gibson W. 2014. Meiosis and Haploid Gametes in the Pathogen *Trypanosoma brucei*. *Current*  
948 *Biology* 24: 181-186.
- 949 Peacock L, Ferris V, Sharma R, Sunter J, Bailey M, Carrington M, Gibson W. 2011. Identification of the meiotic life cycle stage of  
950 *Trypanosoma brucei* in the tsetse fly. *Proceedings of the National Academy of Sciences of the United States of America* 108:  
951 3671-3676.
- 952 Pejler B. 1995. Relation to habitat in rotifers. *Hydrobiologia* 313: 267-278.
- 953 Perez M, Valverde J, Batuecas B, Amat F, Marco R, Garesse R. 1994. Speciation in the *Artemia* genus: mitochondrial DNA analysis  
954 of bisexual and parthenogenetic brine shrimps. *Journal of Molecular Evolution* 38: 156-168.
- 955 Pieri V, Martens K, Stoch F, Rossetti G. 2009. Distribution and ecology of non-marine ostracods (Crustacea, Ostracoda) from Friuli  
956 Venezia Giulia (NE Italy). *Journal of Limnology* 68: 1-15.
- 957 Pilato G. 1979. Correlations between cryptobiosis and other biological characteristics in some soil animals. *Italian Journal of Zoology*  
958 46: 319-332.
- 959 Pinto R, Rocha C, Martens K. 2005. On new terrestrial ostracods (Crustacea, Ostracoda) from Brazil, primarily from Sao Paulo State.  
960 *Zoological Journal of the Linnean Society* 145: 145-173.
- 961 Poinar GO, Ricci C. 1992. Bdelloid rotifers in Dominican amber: evidence for parthenogenetic continuity. *Experientia* 48: 408-410.

- 962 Pokorný V. 1965. *Principles of Zoological Micropalaeontology: Vol. 2 International Series of Monographs on Earth Sciences*.  
963 Oxford: Pergamon Press.
- 964 Pongratz N, Storhas M, Carranza S, Michiels N. 2003. Phylogeography of competing sexual and parthenogenetic forms of a  
965 freshwater flatworm: patterns and explanations. *Bmc Evolutionary Biology* 3.
- 966 Panyi H. 1992. Studies of the crustacean fauna of a Hungarian hot spring (Héviz Spa). *Zoologischen Jahrbüchern abteilung für*  
967 *Systematik Ökologie und Geographie* 119: 397-404.
- 968 Pouchkina-Stantcheva NN, McGee BM, Boschetti C, Tolleter D, Chakrabortee S, Popova AV, Meersman F, Macherel D, Hinch DK,  
969 Tunnacliffe A. 2007. Functional divergence of former alleles in an ancient asexual invertebrate. *Science* 318: 268-271.
- 970 Provencher L, Morse G, Weeks A, Normark B. 2005. Parthenogenesis in the *Aspidiotus nerii* complex (Hemiptera: Diaspididae): a  
971 single origin of a worldwide, polyphagous lineage associated with *Cardinium* bacteria. *Annals of the Entomological Society of*  
972 *America* 98: 629-635.
- 973 Quattro J, Avise J, Vrijenhoek R. 1992. An ancient clonal lineage in the fish genus *Poeciliopsis* (Atheriniformes: Poeciliidae).  
974 *Proceedings of the National Academy of Sciences of the United States of America* 89: 348-352.
- 975 Quesada CA, Miranda AC, Hodnett MG, Santos AJB, Miranda HS, Breyer LM. 2004. Seasonal and depth variation of soil moisture in  
976 a burned open savanna (campo sujo) in central Brazil. *Ecological Applications* 14: 33-41.
- 977 Radakovits R, Jinkerson R, Fuerstenberg S, Tae H, Settlage R, Boore J, Posewitz M. 2012. Draft genome sequence and genetic  
978 transformation of the oleaginous alga *Nannochloropsis gaditana*. *Nature Communications* 3.
- 979 Ramesh M, Malik S, Logsdon J. 2005. A phylogenomic inventory of meiotic genes: evidence for sex in *Giardia* and an early  
980 eukaryotic origin of meiosis. *Current Biology* 15: 185-191.
- 981 Ranta E. 1979. Population biology of *Darwinula stevensoni* (Crustacea, Ostracoda) in an oligotrophic lake. *Annales Zoologici Fennici*  
982 16: 28-35.

983 Reeves J, De Deckker P, Halse S. 2007. Groundwater Ostracods from the arid Pilbara region of northwestern Australia: distribution  
984 and water chemistry. *Hydrobiologia* 585: 99-118.

985 Remy W, Taylor T, Hass H, Kerp H. 1994. Four hundred-million-year-old vesicular arbuscular mycorrhizae. *Proceedings of the*  
986 *National Academy of Sciences of the United States of America* 91: 11841-11843.

987 Retrum J, Hasiotis S, Kaesler R. 2011. Neoichnological experiments with the freshwater ostracode *Heterocypris incongruens*:  
988 implications for reconstructing aquatic settings. *Palaios* 26: 509-518.

989 Ricci C. 1987. Ecology of bdelloids: how to be successful. *Hydrobiologia* 147: 117-127.

990 Ricci C. 2001. Dormancy patterns in rotifers. *Hydrobiologia* 446: 1-11.

991 Ricci C, Balsamo M. 2000. The biology and ecology of lotic rotifers and gastrotrichs. *Freshwater Biology* 44: 15-28.

992 Ricci C, Melone G, Walsh EJ. 2001. A carnivorous bdelloid rotifer, *Abrochtha carnivora* n. sp. *Invertebrate Biology* 120: 136-141.

993 Ricci C, Perletti F. 2006. Starve and survive: stress tolerance and life-history traits of a bdelloid rotifer. *Functional Ecology* 20: 340-  
994 346.

995 Robeson MS, King AJ, Freeman KR, Birky CW, Martin AP, Schmidt SK. 2011. Soil rotifer communities are extremely diverse  
996 globally but spatially autocorrelated locally. *Proceedings of the National Academy of Sciences of the United States of America*  
997 108: 4406-4410.

998 Rohde K. 1986. Differences in species diversity of Monogenea between the Pacific and Atlantic Oceans. *Hydrobiologia* 137(1): 21-  
999 28.

1000 Rohde K, Heap M. 1998. Latitudinal differences in species and community richness and in community structure of metazoan endo-  
1001 and ectoparasites of marine teleost fish. *International Journal For Parasitology* 28(3): 461-474.

1002 Rosendahl S, Taylor J. 1997. Development of multiple genetic markers for studies of genetic variation in arbuscular mycorrhizal fungi  
1003 using AFLP(TM). *Molecular Ecology* 6: 821-829.

- 1004 Rossetti G, Martens K. 1996. Redescription and morphological variability of *Darwinula stevensoni* (Brady & Robertson, 1870)  
1005 (Crustacea, Ostracoda). *Bulletin Koninklijk Belgisch Instituut voor Natuurwetenschappen* 66: 73-92.
- 1006 Rossetti G, Martens K. 1998. Taxonomic revision of the recent and Holocene representatives of the family Darwinulidae (Crustacea,  
1007 Ostracoda), with a description of three new genera. *Bulletin Koninklijk Belgisch Instituut voor Natuurwetenschappen* 68: 55-  
1008 110.
- 1009 Rossetti G, Pinto R, Martens K. 2011. Description of a new genus and two new species of Darwinulidae (Crustacea, Ostracoda), from  
1010 Christmas Island (Indian Ocean) with some considerations on the morphological evolution of ancient asexuals. *Belgian*  
1011 *Journal of Zoology* 141: 55-74.
- 1012 Rossi V, Schön I, Butlin R, Menozzi P. 1998. Clonal genetic diversity. In: Martens K, ed. *Sex and Parthenogenesis: Evolutionary*  
1013 *Ecology of Reproductive Modes in Non-Marine Ostracods*. Leiden: Backhuys, 257-274.
- 1014 Rossi V, Todeschi E, Gandolfi A, Invidia M, Menozzi P. 2002. Hypoxia and starvation tolerance in individuals from a riverine and a  
1015 lacustrine population of *Darwinula stevensoni* (Crustacea: Ostracoda). *Archiv Fur Hydrobiologie* 154: 151-171.
- 1016 Sandoval C, Carmean D, Crespi B. 1998. Molecular phylogenetics of sexual and parthenogenetic *Timema* walking-sticks. *Proceedings*  
1017 *of the Royal Society B-Biological Sciences* 265: 589-595.
- 1018 Sandoval C, Vickery V. 1996. *Timema douglasi* (Phasmatoptera: Timematodea), a new parthenogenetic species from southwestern  
1019 Oregon and northern California, with notes on other species. *Canadian Entomologist* 128: 79-84.
- 1020 Schaefer I, Domes K, Heethoff M, Schneider K, Schön I, Norton RA, Scheu S, Maraun M. 2006. No evidence for the 'Meselson effect'  
1021 in parthenogenetic oribatid mites (Oribatida, Acari). *Journal of Evolutionary Biology* 19: 184-193.
- 1022 Scholl K, Devetter M. 2013. Soil rotifers new to Hungary from the Gemenc floodplain (Duna-Drava National Park, Hungary). *Turkish*  
1023 *Journal of Zoology* 37: 406-412.
- 1024 Schön I, Arkhipova I. 2006. Two families of non-LTR retrotransposons, *Syrinx* and *Daphne*, from the Darwinulid ostracod,  
1025 *Darwinula stevensoni*. *Gene* 371: 296-307.

- 1026 Schön I, Butlin R, Griffiths H, Martens K. 1998. Slow molecular evolution in an ancient asexual ostracod. *Proceedings of the Royal*  
1027 *Society of London Series B-Biological Sciences* 265: 235-242.
- 1028 Schön I, Gandolfi A, Di Masso E, Rossi V, Griffiths H, Martens K, Butlin R. 2000. Persistence of asexuality through mixed  
1029 reproduction in *Eucypris virens* (Crustacea, Ostracoda). *Heredity* 84: 161-169.
- 1030 Schön I, Martens K. 2003. No slave to sex. *Proceedings of the Royal Society of London Series B-Biological Sciences* 270: 827-833.
- 1031 Schön I, Martens K. 2004. Adaptive, pre-adaptive and non-adaptive components of radiations in ancient lakes: a review. *Organisms*  
1032 *Diversity & Evolution* 4: 137-156.
- 1033 Schön I, Martens K, Van Doninck K, Butlin R. 2003. Evolution in the slow lane: molecular rates of evolution in sexual and asexual  
1034 ostracods (Crustacea: Ostracoda). *Biological Journal of the Linnean Society* 79: 93-100.
- 1035 Schön I, Rossetti G, Martens K. 2009. Darwinulid ostracods: ancient asexual scandals or scandalous gossip? In: Schön I, Martens K,  
1036 van Dijk P, eds. *Lost Sex: The Evolutionary Biology of Parthenogenesis*. Dordrecht: Springer Science+Business Media B.V.,  
1037 217-240.
- 1038 Schurko A, Neiman M, Logsdon J. 2009. Signs of sex: what we know and how we know it. *Trends in Ecology & Evolution* 24: 208-  
1039 217.
- 1040 Schwander T. 2016. Evolution: The end of an ancient asexual scandal. *Current Biology* 26: R233–R235.
- 1041 Schwander T, Crespi B. 2009a. Multiple direct transitions from sexual reproduction to apomictic parthenogenesis in *Timema* stick  
1042 insects. *Evolution* 63: 84-103.
- 1043 Schwander T, Crespi B. 2009b. Twigs on the tree of life? Neutral and selective models for integrating macroevolutionary patterns with  
1044 microevolutionary processes in the analysis of asexuality. *Molecular Ecology* 18: 28-42.
- 1045 Schwander T, Crespi B, Gries R, Gries G. 2013. Neutral and selection-driven decay of sexual traits in asexual stick insects.  
1046 *Proceedings of the Royal Society B: Biological Sciences* 280.



- 1047 Schwander T, Henry L, Crespi B. 2011. Molecular evidence for ancient asexuality in *Timema* stick insects. *Current Biology* 21: 1129-  
1048 1134.
- 1049 Schwander T, Vuilleumier S, Dubman J, Crespi B. 2010. Positive feedback in the transition from sexual reproduction to  
1050 parthenogenesis. *Proceedings of the Royal Society B-Biological Sciences* 277: 1435-1442.
- 1051 Scott H. 1961. Classification of Ostracoda. In: Moore R, Pitrat C, eds. *Treatise on Invertebrate Paleontology. Part Q. Arthropoda 3.*  
1052 *Crustacea Ostracoda*. Lawrence: Geological Society of America and University of Kansas Press, 74-92.
- 1053 Segers H. 2007. Annotated checklist of the rotifers (Phylum Rotifera), with notes on nomenclature, taxonomy and distribution.  
1054 *Zootaxa*: 1-104.
- 1055 Segers H. 2008. Global diversity of rotifers (Rotifera) in freshwater. *Hydrobiologia* 595: 49-59.
- 1056 Sheldon P. 1996. Plus ça change—a model for stasis and evolution in different environments. *Palaeogeography, Palaeoclimatology,*  
1057 *Palaeoecology* 127: 209–227.
- 1058 Sibley L, Boothroyd J. 1992. Virulent strains of *Toxoplasma gondii* comprise a single clonal lineage. *Nature* 359: 82-85.
- 1059 Siepel H. 1994. Life-history tactics of soil microarthropods. *Biology and Fertility of Soils* 18(4): 263-278.
- 1060 Siepel H. 1996. Biodiversity of soil microarthropods: the filtering of species. *Biodiversity & Conservation* 5: 251-260.
- 1061 Signorovitch A, Dellaporta S, Buss L. 2005. Molecular signatures for sex in the Placozoa. *Proceedings of the National Academy of*  
1062 *Sciences of the United States of America* 102: 15518-15522.
- 1063 Signorovitch A, Hur J, Gladyshev E, Meselson M. 2015. Allele sharing and evidence for sexuality in a mitochondrial clade of bdelloid  
1064 rotifers. *Genetics* 200: 581-590.
- 1065 Signorovitch A, Hur J, Gladyshev E, Meselson M. 2016. Evidence for meiotic sex in bdelloid rotifers. *Current Biology* 26: R754–  
1066 R755.
- 1067 Simon J, Leterme N, Latorre A. 1999. Molecular markers linked to breeding system differences in segregating and natural populations  
1068 of the cereal aphid *Rhopalosiphum padi* L. *Molecular Ecology* 8: 965-973.

- 1069 Simon J, MartinezTorres D, Latorre A, Moya A, Hebert P. 1996. Molecular characterization of cyclic and obligate parthenogens in the  
1070 aphid *Rhopalosiphum padi* (L). *Proceedings of the Royal Society B-Biological Sciences* 263: 481-486.
- 1071 Skubala P, Gulvik M. 2005. Pioneer oribatid mite communities (Acari, Oribatida) in newly exposed natural (glacier foreland) and  
1072 anthropogenic (post-industrial dump) habitats. *Polish Journal of Ecology* 53: 395-407.
- 1073 Smith R, Kamiya T, Horne D. 2006. Living males of the 'ancient asexual' Darwinulidae (Ostracoda: Crustacea). *Proceedings of the*  
1074 *Royal Society B-Biological Sciences* 273: 1569-1578.
- 1075 Sohlenius B, Bostrom S. 2005. The geographic distribution of metazoan microfauna on East Antarctic nunataks. *Polar Biology* 28:  
1076 439-448.
- 1077 Sorensen MV, Giribet G. 2006. A modern approach to rotiferan phylogeny: combining morphological and molecular data. *Molecular*  
1078 *Phylogenetics and Evolution* 40: 585-608.
- 1079 Speijer D, Lukes J, Elias M. 2015. Sex is a ubiquitous, ancient, and inherent attribute of eukaryotic life. *Proceedings of the National*  
1080 *Academy of Sciences of the United States of America* 112: 8827-8834.
- 1081 Spolsky CM, Phillips CA, Uzzell T. 1992. Antiquity of clonal salamander lineages revealed by mitochondrial DNA. *Nature* 356: 706-  
1082 708.
- 1083 Stanley S. 1979. *Macroevolution, Pattern and Process*. Johns Hopkins University Press.
- 1084 Stenberg P, Lundmark M. 2004. Distribution, mechanisms and evolutionary significance of clonality and polyploidy in weevils.  
1085 *Agricultural and Forest Entomology* 6: 259-266.
- 1086 Straub E. 1952. Mikropaläontologische Untersuchungen im Tertiär zwischen Ehingen und Ulm ad Donau. *Geologisches Jahrbucher* 6:  
1087 433-523.
- 1088 Stukenbrock E, Rosendahl S. 2005. Clonal diversity and population genetic structure of arbuscular mycorrhizal fungi (*Glomus* spp.)  
1089 studied by multilocus genotyping of single spores. *Molecular Ecology* 14: 743-752.

- 1090 Subías L. 2004. Listado sistemático, sinonímico y biogeográfico de los ácaros oribátidos (Acariformes, Oribatida) del mundo (1758-  
1091 2002). *Graellsia* 60: 3-305.
- 1092 Suga H, Chen Z, de Mendoza A, Sebe-Pedros A, Brown M, Kramer E, Carr M, Kerner P, Vervoort M, Sanchez-Pons N, Torruella G,  
1093 Derelle R, Manning G, Lang B, Russ C, Haas B, Roger A, Nusbaum C, Ruiz-Trillo I. 2013. The *Capsaspora* genome reveals a  
1094 complex unicellular prehistory of animals. *Nature Communications* 4.
- 1095 Suttle CS. 2005. Viruses in the sea. *Nature* 437: 356-361.
- 1096 Suttle CS. 2007. Marine viruses—major players in the global ecosystem. *Nature Reviews Microbiology* 5: 801-812.
- 1097 Suttle CS, Chan AM, Cottrell MT. 1990. Infection of phytoplankton by viruses and reduction of primary productivity. *Nature* 347:  
1098 467-469.
- 1099 Taberly G. 1987. Recherches sur la parthénogenèse thélytoque de deux espèces d'acariens oribates: *Trhypochthonius tectorum*  
1100 (Berlese) et *Platynothrus peltifer* (Koch). III: Etude anatomique, histologique et cytologique des femelles parthénogénétiques.  
1101 *Acarologia* 28: 389-403.
- 1102 Taberly G. 1988. Recherches sur la parthénogenèse thélytoque de deux espèces d'Acariens Oribates: *Trhypochthonius tectorum*  
1103 (Berlese) et *Platynothrus peltifer* (Koch). IV: Observations sur les mâles ataviques. *Acarologia* 29: 95-107.
- 1104 Tay W, O'Mahony E, Paxton R. 2005. Complete rRNA gene sequences reveal that the microsporidium *Nosema bombi* infects diverse  
1105 bumblebee (*Bombus* spp.) hosts and contains multiple polymorphic sites. *Journal of Eukaryotic Microbiology* 52: 505-513.
- 1106 Taylor D, Ó Foighil D. 2000. Transglobal comparisons of nuclear and mitochondrial genetic structure in a marine polyploid clam  
1107 (*Lasaea*, Lasaeidae). *Heredity* 84: 321-330.
- 1108 Tétart J. 1978. Les garnitures chromosomiques des Ostracodes d'eau douce. *Travaux du laboratoire d'hydrobiologie de l'Université de*  
1109 *Grenoble* 39: 113-140.
- 1110 Thiriot-Quivreux C. 1992. Karyotype of *Lasaea australis*, a brooding bivalve species. *Australian Journal of Marine and Freshwater*  
1111 *Research* 43: 403-408.

- 1112 Thiriot-Quivreux C, Soyer J, Debovee F, Albert P. 1988. Unusual chromosome complement in the brooding bivalve *Lasaea*  
1113 *consanguinea*. *Genetica* 76: 143-151.
- 1114 Thorp J, Covich A. 1991. *Ecology and classification of North American freshwater invertebrates*, v. 2. San Diego: Academic Press.
- 1115 Tibayrenc M. 1997. Are *Candida albicans* natural populations subdivided? *Trends in Microbiology* 5: 253-254.
- 1116 Tibayrenc M, Kjellberg F, Arnaud J, Oury B, Breniere S, Darde M, Ayala F. 1991. Are eukaryotic microorganisms clonal or sexual?  
1117 A population genetics vantage. *Proceedings of the National Academy of Sciences of the United States of America* 88: 5129-  
1118 5133.
- 1119 Tibayrenc M, Kjellberg F, Ayala F. 1990. A clonal theory of parasitic protozoa: the population structures of *Entamoeba*, *Giardia*,  
1120 *Leishmania*, *Naegleria*, *Plasmodium*, *Trichomonas*, and *Trypanosoma* and their medical and taxonomical consequences.  
1121 *Proceedings of the National Academy of Sciences of the United States of America* 87: 2414-2418.
- 1122 Tigano M, Carneiro R, Jeyaprakash A, Dickson D, Adams B. 2005. Phylogeny of *Meloidogyne* spp. based on 18S rDNA and the  
1123 intergenic region of mitochondrial DNA sequences. *Nematology* 7: 851-862.
- 1124 Tinn O, Oakley T. 2008. Erratic rates of molecular evolution and incongruence of fossil and molecular divergence time estimates in  
1125 Ostracoda (Crustacea). *Molecular Phylogenetics and Evolution* 48: 157-167.
- 1126 Tisserant E, Malbreil M, Kuo A, Kohler A, Symeonidi A, Balestrini R, Charron P, Duensing N, Frey N, Gianinazzi-Pearson V, Gilbert  
1127 L, Handa Y, Herr J, Hijri M, Koul R, Kawaguchi M, Krajinski F, Lammers P, Masclauxm F, Murat C, Morin E, Ndikumana S,  
1128 Pagni M, Petitpierre D, Requena N, Rosikiewicz P, Riley R, Saito K, Clemente H, Shapiro H, Van Tuinen D, Becard G,  
1129 Bonfante P, Paszkowski U, Shachar-Hill Y, Tuskan G, Young P, Sanders I, Henrissat B, Rensing S, Grigoriev I, Corradi N,  
1130 Roux C, Martin F. 2013. Genome of an arbuscular mycorrhizal fungus provides insight into the oldest plant symbiosis.  
1131 *Proceedings of the National Academy of Sciences of the United States of America* 110: 20117-20122.
- 1132 Tobler M, Schlupp I, de Leon F, Glaubrecht M, Plath M. 2007. Extreme habitats as refuge from parasite infections? Evidence from an  
1133 extremophile fish. *Acta Oecologica* 31: 270-275.

- 1134 Tokeshi M. 1999. *Species Coexistence: Ecological and Evolutionary Perspectives*. Oxford, UK: Blackwell Science Ltd.
- 1135 Triantaphyllou A. 1981. Oogenesis and the chromosomes of the parthenogenetic root-knot nematode *Meloidogyne incognita*. *Journal*  
1136 *of Nematology* 13: 95-104.
- 1137 Trudgill DL, Blok VC. 2001. Apomictic, polyphagous root-knot nematodes: exceptionally successful and damaging biotrophic root  
1138 pathogens. *Annual Review of Phytopathology* 39: 53-77.
- 1139 Tudorancea C, Green R, Huebner J. 1979. Structure, dynamics and production of the benthic fauna in Lake Manitoba. *Hydrobiologia*  
1140 64: 59-95.
- 1141 Tyler-Walters H, Davenport J. 1990. The relationship between the distribution of genetically distinct inbred lines and upper lethal  
1142 temperature in *Lasaea rubra*. *Journal of the Marine Biological Association of the United Kingdom* 70: 557-570.
- 1143 Tzung K, Williams R, Scherer S, Federspiel N, Jones T, Hansen N, Bivolarevic V, Huizar L, Komp C, Surzycki R, Tamse R, Davis R,  
1144 Agabian N. 2001. Genomic evidence for a complete sexual cycle in *Candida albicans*. *Proceedings of the National Academy*  
1145 *of Sciences of the United States of America* 98: 3249-3253.
- 1146 Vandenkoornhuyse P, Leyval C, Bonnin I. 2001. High genetic diversity in arbuscular mycorrhizal fungi: evidence for recombination  
1147 events. *Heredity* 87: 243-253.
- 1148 Verma K. 1969. A new subspecies of *Impatiens impatiensae* (Shinji) and the male of *Protrama penecaeca* (Stroyan) from NW  
1149 India (Homoptera: Aphididae). *Bulletin of entomology* 10: 102-103.
- 1150 Vickery V. 1993. Revision of *Timema* (Scudder) (Phasmatoptera: Timematodea) including three new species. *Canadian Entomologist*  
1151 125: 657-692.
- 1152 Vickery V, Sandoval C. 2001. Descriptions of three new species of *Timema* (Phasmatoptera: Timematodea: Timematidae) and notes  
1153 on three other species. *Journal of Orthoptera Research* 10: 53-61.
- 1154 Villesen P, Mueller U, Schultz T, Adams R, Bouck A. 2004. Evolution of ant-cultivar specialization and cultivar switching in  
1155 *Apterostigma* fungus-growing ants. *Evolution* 58: 2252-2265.

1156 Vrijenhoek R, Parker E. 2009. Geographical parthenogenesis: general purpose genotypes and frozen niche variation. In: Schön I,  
1157 Martens K, van Dijk P, eds. *Lost Sex: The Evolutionary Biology of Parthenogenesis*: Dordrecht: Springer Science+Business  
1158 Media B.V., 99-131.

1159 Waggoner BM, Poinar GO. 1993. Fossil habrotrochid rotifers in Dominican amber. *Experientia* 49: 354-357.

1160 Wallace R, Ricci C, Melone G. 1996. A cladistic analysis of pseudocoelomate (aschelminth) morphology. *Invertebrate Biology* 115:  
1161 104-112.

1162 Wallwork, JA. 1970. *Ecology of soil animals*. London, UK: McGRAW-HILL Publishing Company Limited.

1163 Walter D. 2001. Endemism and cryptogenesis in 'segmented' mites: a review of Australian Alicorhagiidae, Terpnacaridae,  
1164 Oehserchestidae and Grandjeanicidae (Acari: sarcoptiformes). *Australian Journal of Entomology* 40: 207-218.

1165 Walter D. 2009. Suborder Endeostigmata. In: Krantz G, Walter D, eds. *A manual of acarology*. Lubbock: Texas Tech University  
1166 Press, 421-429.

1167 Walter D, Lindquist E, Smith I, Cook D, Krantz G. 2009. Order Trombidiformes. In: Krantz G, Walter D, eds. *A manual of acarology*.  
1168 Lubbock: Texas Tech University Press, 233-420.

1169 Weedall G, Hall N. 2015. Sexual reproduction and genetic exchange in parasitic protists. *Parasitology* 142: S120-S127.

1170 Weiss M. 2001. Widespread hermaphroditism in freshwater gastrotrichs. *Invertebrate Biology* 120: 308-341.

1171 Welch D. 2000. Evidence from a protein-coding gene that acanthocephalans are rotifers. *Invertebrate Biology* 119: 17-26.

1172 Welch D, Cummings MP, Hillis DM, Meselson M. 2004a. Divergent gene copies in the asexual class Bdelloidea (Rotifera) separated  
1173 before the bdelloid radiation or within bdelloid families. *Proceedings of the National Academy of Sciences of the United States*  
1174 *of America* 101: 1622-1625.

1175 Welch D, Meselson M. 2000. Evidence for the evolution of bdelloid rotifers without sexual reproduction or genetic exchange. *Science*  
1176 288: 1211-1215.

- 1177 Welch D, Ricci C, Meselson M. 2009. Bdelloid rotifers: progress in understanding the success of an evolutionary scandal. In: Schön I,  
1178 Martens K, van Dijk P, eds. *Lost Sex: The Evolutionary Biology of Parthenogenesis*. Dordrecht: Springer Science+Business  
1179 Media B.V., 259-279.
- 1180 Welch D, Welch J, Meselson M. 2008. Evidence for degenerate tetraploidy in bdelloid rotifers. *Proceedings of the National Academy  
1181 of Sciences of the United States of America* 105: 5145-5149.
- 1182 Welch J, Welch D, Meselson M. 2004b. Cytogenetic evidence for asexual evolution of bdelloid rotifers. *Proceedings of the National  
1183 Academy of Sciences of the United States of America* 101: 1618-1621.
- 1184 Welch J, Meselson M. 1998. Karyotypes of bdelloid rotifers from three families. *Hydrobiologia* 387: 403-407.
- 1185 Wickstrom C, Castenholz R. 1985. Dynamics of cyanobacterial and ostracod interactions in an Oregon hot spring. *Ecology* 66: 1024-  
1186 1041.
- 1187 Wilson C. 2011. Desiccation-tolerance in bdelloid rotifers facilitates spatiotemporal escape from multiple species of parasitic fungi.  
1188 *Biological Journal of the Linnean Society* 104(3): 564-574.
- 1189 Wilson C, Sherman P. 2010. Anciently asexual bdelloid rotifers escape lethal fungal parasites by drying up and blowing away. *Science*  
1190 327: 574-576.
- 1191 Witek A, Herlyn H, Meyer A, Boell L, Bucher G, Hankeln T. 2008. EST based phylogenomics of Syndermata questions monophyly  
1192 of Eurotatoria. *Bmc Evolutionary Biology* 8.
- 1193 Wommack KE, Colwell RR. 2000. Virioplankton: Viruses in Aquatic Ecosystems. *Microbiology and Molecular Biology Reviews* 64:  
1194 69-114.
- 1195 Wrensch D, Kethley J, Norton R. 1994. Cytogenetics of holokinetic chromosomes and inverted meiosis: keys to the evolutionary  
1196 success of mites, with generalizations on eukaryotes. In: Houck M, ed. *Mites. Ecological and Evolutionary Analyses of Life-  
1197 History Patterns*. New York: Chapman & Hall, 282-343.

- 1198 Wysocka A, Konopa G, Wegrzyn G, Wrobel B. 2006. Genomic DNA hybridization as an attempt to evaluate phylogenetic  
1199 relationships of Ostracoda. *Crustaceana* 79: 1309-1322.
- 1200 Yamada S. 2007. Structure and evolution of podocopan ostracod hinges. *Biological Journal of the Linnean Society* 92: 41-62.
- 1201 Yamaguchi S, Endo K. 2003. Molecular phylogeny of Ostracoda (Crustacea) inferred from 18S ribosomal DNA sequences:  
1202 implication for its origin and diversification. *Marine Biology* 143: 23-38.
- 1203 Yu N, Zhao M, Chen L, Yang P. 2006. Phylogenetic relationship of Podocopida (Ostracoda: Podocopa) based on 18S ribosomal DNA  
1204 sequences. *Acta Oceanologica Sinica* 25: 99-108.
